# Supplementary material for: A blinded international study on the reliability of genetic testing for GGGGCC-repeat expansions in C9orf72 reveals marked differences in results among 14 laboratories
Source: PubMed Central journal article supplement — J Med Genet. 2014 Apr 4;51(6):419–24. doi: 10.1136/jmedgenet-2014-102360 (PMC4033024; doi:10.1136/jmedgenet-2014-102360), 2014-04-04
Supplement: jmedgenet-2014-102360-s1.pdf [file jmedgenet-2014-102360-s1.pdf]

SUPPLEMENTARY MATERIAL

**A blinded international study on the reliability of genetic testing  
for GGGGCC-repeat expansions in *C9orf72* reveals marked  
differences in results among 14 laboratories**

Chizuru Akimoto, Alexander E Volk *et al.*

**Supplementary table 1. The results of 78 samples.**

| <b>RP-PCR results</b>                            |                    |                                                                                                                                     |
|--------------------------------------------------|--------------------|-------------------------------------------------------------------------------------------------------------------------------------|
| All laboratories same results                    | 50 samples (64.1%) |                                                                                                                                     |
| 1 laboratory different result                    | 20 samples (25.6%) | 13 samples (16.7%): 1 laboratory Q result<br>5 samples (6.41%): 1 laboratory FP result<br>2 samples (2.56%): 1 laboratory FN result |
| 2 laboratories different results                 | 5 samples (6.41%)  | 4 samples (5.12%): 2 laboratories Q results<br>1 sample (1.28%): 1 laboratory FN and 1 laboratory Q results                         |
| 6 laboratories different results                 | 2 samples (2.56%)  | 1 sample (1.28%): 1 laboratory FN and 5 laboratories Q results<br>1 sample (1.28%): 6 laboratories Q results                        |
| 7 laboratories different results                 | 1 sample (1.28%)   | 1 sample (1.28%): 1 laboratory FN and 6 laboratories Q results                                                                      |
| <b>Amplicon-length analysis results</b>          |                    |                                                                                                                                     |
| All laboratories same results                    | 72 samples (92.3%) |                                                                                                                                     |
| 1 laboratory different result                    | 2 samples (2.56%)  | 1 sample (1.28%): 1 laboratory different peak number<br>1 sample (1.28%): 1 laboratory Q result                                     |
| 2 laboratories different results                 | 1 sample (1.28%)   | 1 sample (1.28%): 1 laboratory different peak number and 1 laboratory Q result                                                      |
| 3 laboratories different results                 | 1 sample (1.28%)   | 1 sample (1.28%): 1 laboratory different peak number and 2 laboratories Q results                                                   |
| 5 laboratories different results                 | 2 samples (2.56%)  | 2 samples (2.56%): 4 laboratories different peak number and 1 laboratory Q result                                                   |
| <b>RP-PCR + amplicon-length analysis results</b> |                    |                                                                                                                                     |
| All laboratories same results                    | 53 samples (67.9%) |                                                                                                                                     |
| 1 laboratory different result                    | 19 samples (24.4%) | 16 samples (20.5%): 1 laboratory Q result<br>2 samples (2.56%): 1 laboratory FP result<br>1 sample (1.28%): 1 laboratory FN result  |
| 2 laboratories different results                 | 3 samples (3.85%)  | 2 samples (2.56%): 2 laboratories Q results<br>1 sample (1.28%): 1 laboratory FP and 1 laboratory Q results                         |
| 5 laboratories Different results                 | 2 samples (2.56%)  | 1 sample (1.28%): 1 laboratory FN and 4 laboratories Q results<br>1 sample (1.28%): 5 laboratories Q results                        |
| 6 laboratories Different results                 | 1 sample (1.28%)   | 1 sample (1.28%): 1 laboratory FN and 5 laboratories Q results                                                                      |

FP: False positive, FN: False negative, Q: Undecided or unclassified sample.

**Supplementary table 2. The GGGGCC-repeat numbers on 78 samples from 32 families.**

| Sample | Allele 1 | Allele 2 | Sample | Allele 1 | Allele 2 |
|--------|----------|----------|--------|----------|----------|
| 1.1    | 7        | Expanded | 16.1   | 2        | Expanded |
| 1.2    | 6        | Expanded | 16.3   | 2        | Expanded |
| 2.1    | 2        | Expanded | 17.1   | 2        | 6        |
| 2.2    | 2        | Expanded | 17.2   | 2        | 5        |
| 3.1    | 5        | 12       | 18.1   | 5        | Expanded |
| 3.2    | 2        | Expanded | 18.2   | 2        | Expanded |
| 4.1    | 4        | Expanded | 19.1   | 2        | 2        |
| 4.2    | 4        | Expanded | 19.2   | 2        | 5        |
| 4.3    | 8        | Expanded | 20.1   | 5        | 13       |
| 4.4    | 4        | Expanded | 20.2   | 5        | 6        |
| 5.1    | 2        | 2        | 21.1   | 5        | Expanded |
| 5.2    | 2        | 2        | 21.2   | 5        | Expanded |
| 6.1    | 5        | 5        | 22.1   | 11       | Expanded |
| 6.2    | 2        | Expanded | 22.2   | 2        | Expanded |
| 6.3    | 2        | Expanded | 23.1   | 8        | Expanded |
| 6.4    | 2        | Expanded | 23.2   | 8        | Expanded |
| 6.5    | 23-24    | Expanded | 24.1   | 2        | Expanded |
| 6.6    | 8        | Expanded | 24.2   | 2        | Expanded |
| 6.7    | 8        | Expanded | 25.1   | 2        | 2        |
| 6.8    | 2        | 2        | 25.2   | 2        | 8        |
| 7.1    | 2        | 6        | 26.1   | 2        | Expanded |
| 7.2    | 2        | 5        | 26.2   | 2        | Expanded |
| 8.1    | 2        | 6*       | 26.3   | 23-25    | Expanded |
| 8.2    | 2        | 6*       | 27.1   | 2        | Expanded |
| 9.1    | 2        | 10       | 27.2   | 8        | Expanded |
| 9.2    | 2        | 8        | 27.3   | 5        | Expanded |
| 10.1   | 5        | Expanded | 27.4   | 5        | Expanded |
| 10.2   | 2        | Expanded | 28.1   | 2        | 7        |
| 11.1   | 2        | Expanded | 28.2   | 5        | Expanded |
| 11.2   | 2        | Expanded | 29.1   | 2        | 5        |
| 12.1   | 2        | 5        | 29.2   | 2        | 6        |
| 12.2   | 2        | 8        | 30.1   | 2        | 6        |
| 12.3   | 2        | 5        | 30.2   | 2        | 5        |
| 13.1   | 2        | Expanded | 31.1   | 7        | Expanded |
| 13.2   | 2        | Expanded | 31.2   | 2        | 2        |
| 14.1   | 2        | 2        | 31.3   | 2        | Expanded |
| 14.2   | 2        | 8        | 32.1   | 6*       | Expanded |
| 15.1   | 2        | 6        | 32.2   | 2        | Expanded |
| 15.2   | 6        | 10       | 32.3   | 28-32    | Expanded |

\*: mutant allele.

**Supplementary table 3A. Total methods of 14 laboratories.**

| Laboratory                             | A        | B        | C        | D       | E        | F           | G        | H        | I        | J        | K     | L        | M        | N        |
|----------------------------------------|----------|----------|----------|---------|----------|-------------|----------|----------|----------|----------|-------|----------|----------|----------|
| <b>RP-PCR method</b>                   |          |          |          |         |          |             |          |          |          |          |       |          |          |          |
| Primers*                               | P1, 2, 3 | P7, 8, 9 | P1, 2, 3 | P4, 13  | P4, 5, 6 | P10, 11, 12 | P4, 5, 6 | P1, 2, 3 | P4, 5, 6 | P4, 5, 6 | No    | P1, 2, 3 | P4, 5, 6 | P1, 2, 3 |
| PCR reaction*                          | PR1      | PR2      | PR1      | PR3     | PR4      | PR5         | PR6      | PR1      | PR7      | PR8      | No    | PR1      | PR6      | PR9      |
| Primer 1 dose (μM)                     | 1.4      | 0.2      | 1.4      | 0.2     | 0.4      | 0.33        | 1.0      | 1.4      | 1.4      | 2.5      | No    | 1.4      | 1.0      | 1.4      |
| Primer 2 dose (μM)                     | 0.7      | 0.2      | 0.7      | 0.2     | 0.2      | 0.33        | 1.0      | 0.7      | 0.7      | 2.5      | No    | 0.7      | 1.0      | 0.7      |
| Primer 3 dose (μM)                     | 1.4      | 0.2      | 1.4      | -       | 0.4      | 0.33        | 1.0      | 1.4      | 1.4      | 0.25     | No    | 1.4      | 1.0      | 1.4      |
| Deaza-GTP (mM)                         | 0.18     | 0.2      | 0.18     | 0.2     | 0.0375   | 0           | 0.25     | 0.18     | 0.18     | 0        | No    | 0.18     | 0.25     | 0.16     |
| DNA dose (ng/μl)                       | 7.1      | 5.0      | 2.14     | 2.0     | 20       | 10.0        | 12.5     | 7.1      | 12.0     | 3.3      | No    | 7.1      | 5.0      | 3.3      |
| PCR protocol*                          | PP1      | PP2      | PP3      | PP4     | PP5      | PP6         | PP7      | PP8      | PP7      | PP9      | No    | PP1      | PP7      | PP1      |
| Extension time (min)                   | 3        | 8-18     | 3        | 3       | 40 sec   | 2-10        | 8-16     | 3        | 8-16     | 8-16     | No    | 3        | 8-16     | 3        |
| Total cycle                            | 40       | 45       | 40       | 32      | 65       | 35          | 35       | 43       | 35       | 34       | No    | 40       | 35       | 40       |
| Analysis machine*                      | M1       | M2       | M2       | M1      | M1       | M1          | M1       | M1       | M3       | M1       | No    | M1       | M1       | M2       |
| PCR product conc.                      | 10%      | 10%      | 25%      | 20%     | 0.47%    | 16.2%       | 3.3%     | 0.94%    | 8.8%     | 10%      | No    | 21%      | 4.8%     | 13.3%    |
| Analysis software*                     | A1       | A2       | A1       | A1      | A1       | A5          | A2       | A2       | A2       | A2       | No    | A1       | A1       | A3       |
| Sensitivity                            | 100%     | 100%     | 100%     | 100%    | 91.3%    | 100%        | 97.8%    | 93.5%    | 93.5%    | 93.5%    | 71.7% | 95.7%    | 89.1%    | 93.5%    |
| Specificity                            | 100%     | 100%     | 100%     | 100%    | 96.8%    | 87.5%       | 100%     | 100%     | 100%     | 93.8%    | 96.9% | 100%     | 100%     | 87.5%    |
| Unclassified                           | 0%       | 0%       | 0%       | 0%      | 5.1%     | 2.6%        | 0%       | 3.8%     | 3.8%     | 3.8%     | 14.1% | 2.6%     | 5.1%     | 9.0%     |
| <b>Amplicon length analysis method</b> |          |          |          |         |          |             |          |          |          |          |       |          |          |          |
| Primers*                               | P14, 16  | P14, 16  | P14, 16  | P15, 16 | P14, 16  | P17, 18     | P14, 16  | P14, 16  | P15, 16  | P14, 16  | No    | N.D.     | N.D.     | N.D.     |
| PCR reaction*                          | PR10     | PR11     | PR12     | PR13    | PR10     | PR14        | PR15     | PR16     | PR13     | PR17     | No    | N.D.     | N.D.     | N.D.     |
| DNA dose (ng/μl)                       | 2.2      | 5.0      | 2.4      | 4.2     | 2.0      | 3.3         | 3.35     | 7.1      | 2.0      | 3.3      | No    | N.D.     | N.D.     | N.D.     |
| PCR protocol*                          | PP10     | PP11     | PP12     | PP13    | PP14     | PP15        | PP16     | PP17     | PP18     | PP19     | No    | N.D.     | N.D.     | N.D.     |
| Extension time (min)                   | 1.5      | 1        | 2        | 2       | 1.5      | 1           | 1        | 3        | 2        | 8-16     | No    | N.D.     | N.D.     | N.D.     |
| Total cycle                            | 34       | 38       | 30       | 35      | 35       | 33          | 36       | 40       | 35       | 34       | No    | N.D.     | N.D.     | N.D.     |
| Analysis machine*                      | M1       | M2       | M2       | 4% gel  | M1       | M1          | M1       | M1       | 3% gel   | M1       | No    | N.D.     | N.D.     | N.D.     |
| PCR product conc.                      | 10%      | 0.5%     | 25%      |         | 0.47%    | 16.2%       | 0.17%    | 0.47%    |          | 10%      | No    | N.D.     | N.D.     | N.D.     |
| Analysis software*                     | A1       | A2       | A1       |         | A1       | A5          | A2       | A2       |          | A2       | No    | N.D.     | N.D.     | N.D.     |

\*: Listed in supplementary table 3B and 3C, N.D.: not done. No: no method disclosed.

**Supplementary table 3B. List of products and equipment.**

| <b>Primers for RP-PCR</b> |                                                      |
|---------------------------|------------------------------------------------------|
| P1                        | FAM-AGTCGCTAGAGGCGAAAGC                              |
| P2                        | tacgcatcccagtttgagacGGGGCCGGGGCCGGGGCCGGGG           |
| P3                        | tacgcatcccagtttgagacg                                |
| P4                        | FAM-tgtaaaacgacggccagtCAAGGAGGGAAACAACCGCAGCC        |
| P5                        | caggaaacgctatgaccGGGCCCGCCCCGACCACGCCCGGCCCGGCCCGG   |
| P6                        | caggaaacgctatgacc                                    |
| P7                        | FAM-CAAGGAGGGAAACAACCGCAGCC                          |
| P8                        | ggataacaattcacacaggGGGCCCGCCCCGACCACGCCCGGCCCGGCCCGG |
| P9                        | ggataacaattcacacagg                                  |
| P10                       | FAM-AGTACTCGCTGAGGGTGAAC                             |
| P11                       | cgtacgcatcccagtttgagaGCCCCGGCCCCGGCCCCGG             |
| P12                       | cgtacgcatcccagtttgaga                                |
| P13                       | cacgacgttgtaaacgaCCCCGGCCCCGGCCCCGG                  |

| <b>Primers for amplicon-length analysis</b> |                                                                       |
|---------------------------------------------|-----------------------------------------------------------------------|
| P14                                         | FAM-CAAGGAGGGAAACAACCGCAGCC                                           |
| P15                                         | CAAGGAGGGAAACAACCGCAGCC                                               |
| P16                                         | GCAGGCACCGCAACCGCAG                                                   |
| P17                                         | FAM-CAGGTGTGGGTTTAGGAGGT                                              |
| P18                                         | CCAGCTTCGGTCAGAGAAAT                                                  |
| <b>Size standard</b>                        |                                                                       |
| S1                                          | GeneScan 500XL ROX and 500ROX Size Standard (Applied Biosystems, USA) |
| S2                                          | GeneScan 500LIZ Size Standard (Applied Biosystems, USA)               |
| S3                                          | GeneScan 400HD Rox Size Standard (Applied Biosystems, USA)            |
| S4                                          | GeneScan 600LIZ Size Standard (Applied Biosystems, USA)               |
| <b>Analysis machine</b>                     |                                                                       |
| M1                                          | 3730 and 3730xl DNA Analyzer (Applied Biosystems, USA)                |
| M2                                          | 3130 and 3130xl Genetic Analyzer (Applied Biosystems, USA)            |
| M3                                          | 3500 Genetic Analyzer (Applied Biosystems, USA)                       |
| <b>Analysis software</b>                    |                                                                       |

|    |                                                              |
|----|--------------------------------------------------------------|
| A1 | Peak Scanner Software v1.0 or v2.0 (Applied Biosystems, USA) |
| A2 | GeneMapper Software v4.0 or v4.1 (Applied Biosystems, USA)   |
| A3 | Geotyper v4 (Applied Biosystems, USA)                        |
| A4 | Agarose gel                                                  |
| A5 | In-house developed Tracl genotyping software                 |

**Supplementary table 3C-1. Concentration of ingredients in RP-PCR.**

| PCR reaction number                 | PR1  | PR2 | PR3 | PR4    | PR5  | PR6  | PR7  | PR8  | PR9  |
|-------------------------------------|------|-----|-----|--------|------|------|------|------|------|
| Laboratory                          | ACHL | B   | D   | E      | F    | GM   | I    | J    | N    |
| Qiagen buffer *1                    | -    | -   | -   | 1x     | -    | 1x   | -    | -    | -    |
| FastStart PCR Master *2             | 1x   | -   | -   | -      | -    | -    | -    | -    | -    |
| Taq DNA polymerase (units)          | -    | -   | 1.8 | 0.75   | -    | 2.5  | 1.0  | -    | -    |
| Other buffer and polymerase         | -    | *4  | *5  | -      | *6   | -    | *7   | *8   | *9   |
| Primer 1 ( $\mu$ M)                 | 1.4  | 0.2 | 0.2 | 0.4    | 0.33 | 1.0  | 1.4  | 2.5  | 1.4  |
| Primer 2 (GGGGCC repeat) ( $\mu$ M) | 0.7  | 0.2 | 0.2 | 0.2    | 0.33 | 1.0  | 0.7  | 2.5  | 0.7  |
| Primer 3 ( $\mu$ M)                 | 1.4  | 0.2 | -   | 0.4    | 0.03 | 1.0  | 1.4  | 0.25 | 1.4  |
| dCTP, dATP, dTTP (each) (mM)        | -    | 0.2 | 0.2 | 0.05   | -    | 0.25 | 0.18 | -    | -    |
| 7-deaza-2-deoxy GTP (mM)            | 0.18 | 0.2 | 0.2 | 0.0375 | -    | 0.25 | 0.18 | -    | 0.16 |
| dGTP (mM)                           | -    | -   | -   | 0.0125 | -    | -    | -    | -    | -    |
| dNTPs (each) (mM)                   | -    | -   | -   | -      | 0.5  | -    | -    | -    | -    |
| DMSO                                | 7%   | 5%  | 5%  | -      | -    | 5%   | -    | -    | 7%   |
| Betaine (M)                         | -    | -   | 1.0 | -      | 2.0  | 1.0  | -    | 1.75 | 0.83 |
| Q solution *3                       | 1x   | -   | -   | 1x     | -    | -    | -    | -    | -    |
| MgCl <sub>2</sub> (mM)              | 0.89 | 2.0 | -   | -      | -    | -    | -    | -    | 0.83 |

\*1: *Taq* DNA polymerase (QIAGEN, Germany)

\*2: FastStart PCR Master mix (Roche, Switzerland)

\*3: Q solution (QIAGEN, Germany)

\*4: *Taq* Robust (Kapa Biosystems, USA), Kapa Enhancer 1x.

\*5: RG25 buffer (160mM NH<sub>4</sub>SO<sub>4</sub>, 670mM Tris-HCl (pH 8.8), 1% Tween, 25mM MgCl<sub>2</sub>)

\*6: Expand Long Template PCR system (Roche, Switzerland), Buffer 2 1x, Titanium *Taq* polymerase 2x.

\*7: AccuPrime GC-rich DNA polymerase (Invitrogen, USA), Buffer A 1x.

\*8: Extensor Mastermix (Thermo Scientific, USA)

\*9: True Allele PCR Premix (Applied Biosystems, USA), PCR master mix 1x.



**Supplementary table 3C-2. Concentration of ingredients in amplicon-length analysis PCR.**

| PCR reaction number          | PR10 | PR11 | PR12 | PR13 | PR14 | PR15 | PR16 | PR17 |
|------------------------------|------|------|------|------|------|------|------|------|
| Used laboratory              | AE   | B    | C    | DI   | F    | G    | H    | J    |
| Primer 4 ( $\mu\text{M}$ )   | 0.4  | 0.2  | 0.4  | 0.2  | 0.3  | 1.0  | 0.5  | 0.1  |
| Primer 5 ( $\mu\text{M}$ )   | 0.4  | 0.2  | 0.4  | 0.2  | 0.3  | 1.0  | 0.5  | 0.1  |
| dCTP, dATP, dTTP (each) (mM) | -    | 0.2  | -    | -    | -    | 0.25 | -    | -    |
| 7-deaza-2-deoxy GTP (mM)     | -    | 0.2  | 0.2  | -    | -    | 0.25 | 0.18 | -    |
| dNTP (each) (mM)             | -    | -    | 0.25 | -    | 0.3  | -    | -    | -    |
| DMSO (%)                     | -    | 5.0  | 4.0  | -    | -    | 5.0  | 7.1  | 1.0  |
| Betaine (M)                  | -    | -    | 1.0  | -    | 1.0  | 1.0  | -    | -    |
| Q solution *1                | -    | -    | -    | -    | -    | -    | 1x   | -    |
| MgCl <sub>2</sub> (mM)       | -    | 2.0  | -    | -    | -    | -    | 0.89 | -    |
| Kit buffer                   | 1x   |
| Kit polymerase (U)           | -    | 0.2  | 1.25 | 0.4  | 0.3  | 2.5  | -    | -    |
| Kit and polymerase           | *2   | *3   | *4   | *5   | *6   | *7   | *8   | *9   |

\*1: Q solution (QIAGEN, Germany)

\*2: One *Taq* 2X Master Mix with GC Buffer (New England BioLabs, UK)

\*3: KAPA Enhncer and *Taq* Robust (Kapa Biosystems, USA)

\*4: AmpliTaq and GeneAmp PCR buffer (Roche, Switzerland)

\*5: AccuPrime GC-Rich DNA Polymerase (Invitrogen, USA)

\*6: Kapa HiFi Hotstart PCR kit, GC buffer (Kapa Biosystems, USA)

\*7: *Taq* DNA Polymerase (QIAGEN, Germany)

\*8: FastStart PCR Master mix (Roche, Switzerland)

\*9: Megamix Blue (Microzone, UK)

**Supplementary table 3C-3. PCR protocols for RP-PCR (PP1-9).**

| PP1, Laboratory A, L, N |          |             | PP2, Laboratory B       |          |             | PP3, Laboratory C |        |             |
|-------------------------|----------|-------------|-------------------------|----------|-------------|-------------------|--------|-------------|
| Temp                    | Time     | Cycle       | Temp                    | Time     | Cycle       | Temp              | Time   | Cycle       |
| 95°C                    | 15 min   | 1           | 98°C                    | 10 min   | 1           | 95°C              | 8 min  | 1           |
| 94°C                    | 1 min    | 2           | 98°C                    | 35 sec   | 13          | 95°C              | 1 min  | 8           |
| 70°C                    | 1 min    |             | 65-58°C                 | 2 min    | Every cycle | 70-56°C           | 1 min  | Every cycle |
| 72°C                    | 3 min    |             | 72°C                    | 8 min    | -1°C        | 72°C              | 3 min  | -2°C        |
| 94°C                    | 1 min    | 3           | 97°C                    | 35 sec   | 32          | 95°C              | 1 min  | 32          |
| 68°C                    | 1 min    |             | 58°C                    | 2 min    | Every cycle | 56°C              | 1 min  |             |
| 72°C                    | 3 min    |             | 72°C                    | 8-18 min | +20 sec     | 72°C              | 3 min  |             |
| 94°C                    | 1 min    | 4           | 72°C                    | 10 min   | 1           | 72°C              | 10 min | 1           |
| 66°C                    | 1 min    |             | 4°C                     | hold     | 1           | 4°C               | hold   | 1           |
| 72°C                    | 3 min    |             |                         |          |             |                   |        |             |
| 94°C                    | 1 min    | 5           |                         |          |             |                   |        |             |
| 64°C                    | 1 min    |             |                         |          |             |                   |        |             |
| 72°C                    | 3 min    |             |                         |          |             |                   |        |             |
| 94°C                    | 1 min    | 6           | PP4, Laboratory D       |          |             | PP5, Laboratory E |        |             |
| 62°C                    | 1 min    |             | Temp                    | Time     | Cycle       | Temp              | Time   | Cycle       |
| 72°C                    | 3 min    |             | 95°C                    | 5 min    | 1           | 95°C              | 5 min  | 1           |
| 94°C                    | 1 min    | 7           | 95°C                    | 30 sec   | 32          | 95°C              | 30 sec | 49          |
| 60°C                    | 1 min    |             | 68°C                    | 3 min    |             | 70-53.2°C         | 30 sec | Every cycle |
| 72°C                    | 3 min    |             | 72°C                    | 7 min    |             | 68°C              | 40 sec | -0.35°C     |
| 94°C                    | 1 min    | 8           | 12°C                    | hold     | 1           | 95°C              | 30 sec | 16          |
| 58°C                    | 1 min    |             |                         |          |             | 58°C              | 30 sec |             |
| 72°C                    | 3 min    |             |                         |          |             | 68°C              | 40 sec |             |
| 94°C                    | 1 min    | 5           |                         |          |             | 68°C              | 10 min | 1           |
| 56°C                    | 1 min    |             |                         |          |             | 12°C              | hold   | 1           |
| 72°C                    | 3 min    |             |                         |          |             |                   |        |             |
| 72°C                    | 10 min   | 1           |                         |          |             |                   |        |             |
| 4°C                     | hold     | 1           |                         |          |             |                   |        |             |
| PP6, Laboratory F       |          |             | PP7, Laboratory G, I, M |          |             | PP8, Laboratory H |        |             |
| Temp                    | Time     | Cycle       | Temp                    | Time     | Cycle       | Temp              | Time   | Cycle       |
| 98°C                    | 10 min   | 1           | 98°C                    | 10 min   | 1           | 95°C              | 5 min  | 1           |
| 97°C                    | 35 sec   | 10          | 97°C                    | 35 sec   | 10          | 95°C              | 30 sec | 8           |
| 53°C                    | 2 min    |             | 64°C                    | 2 min    |             | 70-56°C           | 30 sec | Every cycle |
| 68°C                    | 2 min    |             | 68°C                    | 8 min    |             | 72°C              | 3 min  | -2°C        |
| 97°C                    | 35 sec   | 25          | 97°C                    | 35 sec   | 25          | 95°C              | 30 sec | 35          |
| 53°C                    | 2 min    | Every cycle | 64°C                    | 2 min    | Every cycle | 56°C              | 30 sec |             |
| 68°C                    | 2-10 min | +20 sec     | 68°C                    | 8-16 min | +20 sec     | 72°C              | 3 min  |             |
| 68°C                    | 10 min   | 1           | 16°C                    | hold     | 1           | 72°C              | 20 min | 1           |
| 4°C                     | hold     | 1           |                         |          |             | 4°C               | hold   | 1           |

## PCR protocols for RP-PCR (continued).

## PP9, Laboratory J

| Temp    | Time     | Cycle       |
|---------|----------|-------------|
| 95°C    | 5 min    | 1           |
| 95°C    | 30 sec   | 8           |
| 70-56°C | 30 sec   | Every cycle |
| 72°C    | 8 min    | -2°C        |
| 95°C    | 30 sec   | 26          |
| 56°C    | 30 sec   | Every cycle |
| 72°C    | 8-16 min | +20 sec     |
| 72°C    | 7 min    | 1           |
| 4°C     | hold     | 1           |

**Supplementary table 3C-4. PCR protocols for amplicon-length analysis (PP10-19).**

| PP10, Laboratory A |         |             | PP11, Laboratory B |        |       | PP12, Laboratory C |        |       |
|--------------------|---------|-------------|--------------------|--------|-------|--------------------|--------|-------|
| Temp               | Time    | Cycle       | Temp               | Time   | Cycle | Temp               | Time   | Cycle |
| 98°C               | 5 min   | 1           | 97°C               | 5 min  | 1     | 95°C               | 5 min  | 1     |
| 97°C               | 30 sec  | 10          | 97°C               | 30 sec |       | 95°C               | 1 min  |       |
| 65-56°C            | 30 sec  | Every cycle | 60°C               | 30 sec | 10    | 56°C               | 1 min  | 30    |
| 68°C               | 1.5 min | -1°C        | 72°C               | 1 min  |       | 72°C               | 2 min  |       |
| 97°C               | 30 sec  |             | 97°C               | 10 sec |       | 72°C               | 10 min | 1     |
| 55°C               | 30 sec  | 24          | 60°C               | 15 sec | 28    | 4°C                | hold   | 1     |
| 68°C               | 1.5 min |             | 72°C               | 30 sec |       |                    |        |       |
| 68°C               | 10 min  | 1           | 72°C               | 10 min | 1     |                    |        |       |
| 12°C               | hold    | 1           | 4°C                | hold   | 1     |                    |        |       |

## PCR protocols for Amplicon length analysis (continued).

| PP13, Laboratory D |          |             | PP14, Laboratory E |         |             | PP15, Laboratory F |        |       |
|--------------------|----------|-------------|--------------------|---------|-------------|--------------------|--------|-------|
| Temp               | Time     | Cycle       | Temp               | Time    | Cycle       | Temp               | Time   | Cycle |
| P                  |          |             | 98°C               | 5 min   | 1           | 95°C               | 5 min  | 1     |
| 95°C               | 3 min    | 1           | 97°C               | 30 sec  | 11          | 98°C               | 20 sec |       |
| 95°C               | 30 sec   |             | 65-55°C            | 30 sec  | Every cycle | 59°C               | 15 sec | 33    |
| 68°C               | 30 sec   | 35          | 68°C               | 1.5 min | -1°C        | 72°C               | 1 min  |       |
| 72°C               | 2 min    |             | 97°C               | 30 sec  |             | 72°C               | 5 min  | 1     |
| 72°C               | 10 min   | 1           | 55°C               | 30 sec  | 24          | 4°C                | hold   | 1     |
| 12°C               | hold     | 1           | 68°C               | 1.5 min |             |                    |        |       |
|                    |          |             | 68°C               | 10 min  | 1           |                    |        |       |
|                    |          |             | 12°C               | hold    | 1           |                    |        |       |
|                    |          |             |                    |         |             |                    |        |       |
| PP16, Laboratory G |          |             | PP17, Laboratory H |         |             | PP18, Laboratory I |        |       |
| Temp               | Time     | Cycle       | Temp               | Time    | Cycle       | Temp               | Time   | Cycle |
| 94°C               | 4 min    | 1           | 95°C               | 4 min   | 1           | 95°C               | 3 min  | 1     |
| 94°C               | 30 sec   |             | 95°C               | 30 sec  | 14          | 95°C               | 30 sec |       |
| 62°C               | 30 sec   | 36          | 70-57°C            | 30 sec  | Every cycle | 63°C               | 30 sec | 35    |
| 72°C               | 1 min    |             | 72°C               | 3 min   | -1°C        | 72°C               | 2 min  |       |
| 72°C               | 10 min   | 1           | 95°C               | 30 sec  |             | 72°C               | 10 min | 1     |
|                    |          |             | 56°C               | 30 sec  | 26          | 16°C               | hold   | 1     |
|                    |          |             | 72°C               | 3 min   |             |                    |        |       |
|                    |          |             | 72°C               | 10 min  | 1           |                    |        |       |
|                    |          |             | 4°C                | hold    | 1           |                    |        |       |
| PP19, Laboratory J |          |             |                    |         |             |                    |        |       |
| Temp               | Time     | Cycle       |                    |         |             |                    |        |       |
| 95°C               | 5 min    | 1           |                    |         |             |                    |        |       |
| 95°C               | 30 sec   | 8           |                    |         |             |                    |        |       |
| 70-56°C            | 30 sec   | Every cycle |                    |         |             |                    |        |       |
| 72°C               | 8 min    | -2°C        |                    |         |             |                    |        |       |
| 95°C               | 30 sec   | 26          |                    |         |             |                    |        |       |
| 56°C               | 30 sec   | Every cycle |                    |         |             |                    |        |       |
| 72°C               | 8-16 min | +20 sec     |                    |         |             |                    |        |       |
| 72°C               | 7 min    | 1           |                    |         |             |                    |        |       |
| 4°C                | hold     | 1           |                    |         |             |                    |        |       |

## Supplementary table 3D. Methods of each laboratory.

**Laboratory A****RP-PCR**

List

|                               |    |                                                         |
|-------------------------------|----|---------------------------------------------------------|
| Primer 1                      | P1 | FAM-AGTCGCTAGAGGCGAAAGC                                 |
| Primer 2 (with GGGGCC repeat) | P2 | tacgcatcccagtttgagacgGGGGCCGGGGCCGGGGCCGGGG             |
| Primer 3                      | P3 | tacgcatcccagtttgagacg                                   |
| Size standard                 | S2 | GeneScan 500LIZ Size Standard (Applied Biosystems, USA) |
| Analysis machine              | M1 | 3730x/DNA Analyzer (Applied Biosystems, USA)            |
| Analysis software             | A1 | Peak Scanner Software v1.0 (Applied Biosystems, USA)    |

**PCR reaction (PR1)**

| Products             | Final conc.    |
|----------------------|----------------|
| FastStart PCR Master | 1x             |
| Primer 1             | 1.4 µM         |
| Primer 2             | 0.7 µM         |
| Primer 3             | 1.4 µM         |
| 7-deaza-2-deoxy GTP  | 0.18 mM        |
| DMSO                 | 7 %            |
| Q solution           | 1x             |
| MgCl <sub>2</sub>    | 0.89 mM        |
| DNA                  | 7.1 ng/µl      |
| <b>Total</b>         | <b>14.0 µl</b> |

FastStart PCR Master (Roche, Switzerland)  
Q solution (QIAGEN, Germany).

**PCR protocol (PP1)**

| Temp    | Time   | Cycle |
|---------|--------|-------|
| 95°C    | 15 min | 1     |
| 94°C    | 1 min  | 2-8 * |
| 70-58°C | 1 min  |       |
| 72°C    | 3 min  |       |
| 94°C    | 1 min  | 5     |
| 56°C    | 1 min  |       |
| 72°C    | 3 min  |       |
| 72°C    | 10 min | 1     |
| 4°C     | hold   | 1     |

\* Every 2°C decrease add 1 cycle.

**Capillary electrophoresis**

|               |                |
|---------------|----------------|
| PCR product   | 1.0 µl         |
| Size standard | 0.5 µl         |
| Formamide     | 8.5 µl         |
| <b>Total</b>  | <b>10.0 µl</b> |

95°C 5min and on ice.  
Analyse with DNA analyzer.

**Amplicon length analysis**

List

|                   |     |                                                         |
|-------------------|-----|---------------------------------------------------------|
| Primer 4          | P14 | FAM-CAAGGAGGGAAACAACCGCAGCC                             |
| Primer 5          | P16 | GCAGGCACCGCAACCGCAG                                     |
| Size standard     | S2  | GeneScan 500LIZ Size Standard (Applied Biosystems, USA) |
| Analysis machine  | M1  | 3730x/ DNA Analyzer (Applied Biosystems, USA)           |
| Analysis software | A1  | Peak Scanner Software v1.0 (Applied Biosystems, USA)    |

**PCR reaction (PR10)**

| Products     | Final conc.  |
|--------------|--------------|
| Primer 4     | 0.4 µM       |
| Primer 5     | 0.4 µM       |
| Kit buffer   | 1x           |
| DNA          | 2.2 ng/µl    |
| <b>Total</b> | <b>15 µl</b> |

Kit buffer: One *Taq* 2x Master Mix with GC Buffer (New England BioLabs, UK).

**PCR protocol (PP10)**

| Temp    | Time    | Cycle            |
|---------|---------|------------------|
| 98°C    | 5 min   | 1                |
| 97°C    | 30 sec  | 10               |
| 65-56°C | 30 sec  | Every cycle -1°C |
| 68°C    | 1.5 min |                  |
| 97°C    | 30 sec  | 24               |
| 55°C    | 30 sec  |                  |
| 68°C    | 1.5 min |                  |
| 68°C    | 10 min  | 1                |
| 12°C    | hold    | 1                |

**Capillary electrophoresis**

|               |              |
|---------------|--------------|
| PCR product   | 1.0 µl       |
| Size standard | 0.5 µl       |
| Formamide     | 8.5 µl       |
| <b>Total</b>  | <b>10 µl</b> |

95°C 5min and on ice.  
Analyse with DNA analyzer.

Supple table 3D. Methods of each laboratory

**Laboratory B****RP-PCR**

List

|                               |    |                                                                |
|-------------------------------|----|----------------------------------------------------------------|
| Primer 1                      | P7 | FAM-CAAGGAGGGAAACAACCGCAGCC                                    |
| Primer 2 (with GGGGCC repeat) | P8 | ggataacaatttcacacaggGGGCCCCGCCCGACCACGCCCCCGGC<br>CCCGGCCCCCGG |
| Primer 3                      | P9 | ggataacaatttcacacagg                                           |
| Size standard                 | S2 | GeneScan 500 LIZ Size Standard (Applied Biosystems, USA)       |
| Analysis machine              | M2 | 3130xl Genetic Analyzer (Applied Biosystems, USA)              |
| Analysis software             | A2 | GeneMapper Software v4.0 (Applied Biosystems, USA)             |

| PCR reaction (PR2)      |             | PCR protocol (PP2) |          |             | Capillary electrophoresis                                      |
|-------------------------|-------------|--------------------|----------|-------------|----------------------------------------------------------------|
| Products                | Final conc. | Temp               | Time     | Cycle       | Dilute PCR product<br>PCR product:H <sub>2</sub> O=1:1         |
| KAPA Enhancer           | 1x          | 98°C               | 10 min   | 1           | PCR product 2.0 µl<br>Size standard 0.1 µl<br>Formamide 7.9 µl |
| Primer 1                | 0.2 µM      | 98°C               | 35 sec   | 13          |                                                                |
| Primer 2                | 0.2 µM      | 65-58°C            | 2 min    | Every cycle | Total 10.0 µl                                                  |
| Primer 3                | 0.2 µM      | 72°C               | 8 min    | -1°C        |                                                                |
| dCTP, dATP, dTTP (each) | 0.2 mM      | 97°C               | 35 sec   | 32          | 95°C 3min and analyse<br>with genetic analyzer.                |
| 7-deaza-2-deoxy GTP     | 0.2 mM      | 58°C               | 2 min    | Every cycle |                                                                |
| DMSO                    | 5%          | 72°C               | 8-18 min | +20 sec     |                                                                |
| MgCl <sub>2</sub>       | 2.0 mM      | 72°C               | 10 min   | 1           |                                                                |
| Taq Robust              | 0.2 U       | 72°C               | 10 min   | 1           |                                                                |
| DNA                     | 5 ng/µl     | 72°C               | 10 min   | 1           |                                                                |
| Total                   | 20 µl       | 4°C                | hold     | 1           |                                                                |

KAPA Enhancer and *Taq* Robust (Kapa Biosystems, USA). Ramping up and down: 0.5°C/sec

**Amplicon length analysis**

List

|                   |     |                                                         |
|-------------------|-----|---------------------------------------------------------|
| Primer 4          | P14 | FAM-CAAGGAGGGAAACAACCGCAGCC                             |
| Primer 5          | P16 | GCAGGCACCGCAACCGCAG                                     |
| Size standard     | S2  | GeneScan 500LIZ Size Standard (Applied Biosystems, USA) |
| Analysis machine  | M2  | 3130xl Genetic Analyzer (Applied Biosystems, USA)       |
| Analysis software | A2  | GeneMapper Software v4.0 (Applied Biosystems, USA)      |

| PCR reaction (PR11)     |             | PCR protocol (PP11) |        |       | Capillary electrophoresis                                              |
|-------------------------|-------------|---------------------|--------|-------|------------------------------------------------------------------------|
| Products                | Final conc. | Temp                | Time   | Cycle | Dilute PCR product<br>PCR product:H <sub>2</sub> O=1:39                |
| KAPA Enhancer           | 1x          | 97°C                | 5 min  | 1     | Diluted PCR product 2.0 µl<br>Size standard 0.1 µl<br>Formamide 7.9 µl |
| Primer 4                | 0.2 µM      | 97°C                | 30 sec | 10    |                                                                        |
| Primer 5                | 0.2 µM      | 60°C                | 30 sec | 10    | Total 10.0 µl                                                          |
| dCTP, dATP, dTTP (each) | 0.2 mM      | 72°C                | 1 min  | 28    |                                                                        |
| 7-deaza-2-deoxy GTP     | 0.2 mM      | 97°C                | 10 sec | 28    | 95°C 3min and analyse with<br>genetic analyzer.                        |
| DMSO                    | 5%          | 60°C                | 15 sec | 28    |                                                                        |
| MgCl <sub>2</sub>       | 2.0 mM      | 72°C                | 30 sec | 1     |                                                                        |
| Taq Robust              | 0.2 U       | 72°C                | 10 min | 1     |                                                                        |
| DNA                     | 5 ng/µl     | 72°C                | 10 min | 1     |                                                                        |
| Total                   | 20 µl       |                     |        |       |                                                                        |

KAPA Enhancer and *Taq* Robust (Kapa Biosystems, USA)

**Laboratory C****RP-PCR**

List

|                               |    |                                                          |
|-------------------------------|----|----------------------------------------------------------|
| Primer 1                      | P1 | FAM-AGTCGCTAGAGGCGAAAGC                                  |
| Primer 2 (with GGGGCC repeat) | P2 | tacgcatcccagtttgagacgGGGGCCGGGGCCGGGGCCGGGG              |
| Primer 3                      | P3 | tacgcatcccagtttgagacg                                    |
| Size standard                 | S2 | GeneScan 500 LIZ Size Standard (Applied Biosystems, USA) |
| Analysis machine              | M2 | 3130xl genetic analyzer (Applied Biosystems, USA)        |
| Analysis software             | A1 | Peak Scanner Software v1.0 (Applied Biosystems, USA)     |

**PCR reaction (PR1)**

| Products             | Final conc.                 |
|----------------------|-----------------------------|
| FastStart PCR Master | 1x                          |
| Primer 1             | 1.4 $\mu$ M                 |
| Primer 2             | 0.7 $\mu$ M                 |
| Primer 3             | 1.4 $\mu$ M                 |
| 7-deaza-2-deoxy GTP  | 0.18 mM                     |
| DMSO                 | 7 %                         |
| Q solution           | 1x                          |
| MgCl <sub>2</sub>    | 0.89 mM                     |
| DNA                  | 2.14 ng/ $\mu$ l            |
| <b>Total</b>         | <b>28 <math>\mu</math>l</b> |

FastStart PCR Master (Roche, Switzerland)  
Q solution (QIAGEN, Germany)

**PCR protocol (PP3)**

| Temp    | Time   | Cycle       |
|---------|--------|-------------|
| 95°C    | 8 min  | 1           |
| 95°C    | 1 min  | 8           |
| 70-56°C | 1 min  | Every cycle |
| 72°C    | 3 min  | -2°C        |
| 95°C    | 1 min  |             |
| 56°C    | 1 min  | 32          |
| 72°C    | 3 min  |             |
| 72°C    | 10 min | 1           |
| 4°C     | hold   | 1           |

**Capillary electrophoresis**

|                                                      |                               |
|------------------------------------------------------|-------------------------------|
| PCR product                                          | 2.5 $\mu$ l                   |
| Size standard                                        | 0.25 $\mu$ l                  |
| Formamide                                            | 7.25 $\mu$ l                  |
| <b>Total</b>                                         | <b>10.0 <math>\mu</math>l</b> |
| 95°C 2min and 4°C.<br>Analyse with genetic analyzer. |                               |

**Amplicon length analysis**

List

|                   |     |                                                         |
|-------------------|-----|---------------------------------------------------------|
| Primer 4          | P14 | FAM-CAAGGAGGGAAACAACCGCAGCC                             |
| Primer 5          | P16 | GCAGGCACCGCAACCGCAG                                     |
| Size standard     | S2  | GeneScan 500LIZ Size Standard (Applied Biosystems, USA) |
| Analysis machine  | M2  | 3130xl genetic analyzer (Applied Biosystems, USA)       |
| Analysis software | A1  | Peak Scanner Software v1.0 (Applied Biosystems, USA)    |

**PCR reaction (PR12)**

| Products                | Final conc.                   |
|-------------------------|-------------------------------|
| Primer 4                | 0.4 $\mu$ M                   |
| Primer 5                | 0.4 $\mu$ M                   |
| 7-deaza-2-deoxy GTP     | 0.2 mM                        |
| dNTPs (each)            | 0.25 mM                       |
| DMSO                    | 4 %                           |
| Betaine                 | 1.0 M                         |
| GeneAmp PCR buffer      | 1x                            |
| AmpliAmp DNA polymerase | 1.25 U                        |
| DNA                     | 2.4 ng/ $\mu$ l               |
| <b>Total</b>            | <b>25.0 <math>\mu</math>l</b> |

AmpliAmp and GeneAmp PCR buffer (Roche, Switzerland)

**PCR protocol (PP12)**

| Temp | Time   | Cycle |
|------|--------|-------|
| 95°C | 5 min  | 1     |
| 95°C | 1 min  |       |
| 56°C | 1 min  | 30    |
| 72°C | 2 min  |       |
| 72°C | 10 min | 1     |
| 4°C  | hold   | 1     |

**Capillary electrophoresis**

|                                                      |                               |
|------------------------------------------------------|-------------------------------|
| PCR product                                          | 2.5 $\mu$ l                   |
| Size standard                                        | 0.25 $\mu$ l                  |
| Formamide                                            | 7.25 $\mu$ l                  |
| <b>Total</b>                                         | <b>10.0 <math>\mu</math>l</b> |
| 95°C 2min and 4°C.<br>Analyse with genetic analyzer. |                               |

**Laboratory D****RP-PCR**

List

|                               |     |                                                        |
|-------------------------------|-----|--------------------------------------------------------|
| Primer 1                      | P4  | FAM-tgtaaacgacggccagtCAAGGAGGGAAACAACCGCAGCC           |
| Primer 2 (with GGGGCC repeat) | P13 | cacgacgttgtaaacgaCCCCGGCCCCGGCCCCGG                    |
| Primer 3                      | -   | none                                                   |
| Size standard                 | S2  | GeneScan 500LIZ Size Standard (Life Technologies, USA) |
| Analysis machine              | M1  | 3730xL DNA Analyzer (Applied Biosystems, USA)          |
| Analysis software             | A1  | Peak Scanner Software v2.0 (Applied Biosystems, USA)   |

**PCR reaction (PR3)**

| Products                | Final conc.    |
|-------------------------|----------------|
| RG25 buffer             | 1x             |
| Primer 1                | 0.2 µM         |
| Primer 2                | 0.2 µM         |
| dCTP, dATP, dTTP (each) | 0.2 mM         |
| 7-deaza-2-deoxy GTP     | 0.2 mM         |
| DMSO                    | 5%             |
| Betaine                 | 1.0 M          |
| Taq DNA polymerase      | 1.8 U          |
| DNA                     | 2.0 ng/µl      |
| <b>Total</b>            | <b>20.0 µl</b> |

RG25 buffer (160mM NH<sub>4</sub>SO<sub>4</sub>, 670mM Tris-HCl (pH 8.8), 1% Tween, 25mM MgCl<sub>2</sub>)

**PCR protocol (PP4)**

| Temp | Time   | Cycle |
|------|--------|-------|
| 95°C | 5 min  | 1     |
| 95°C | 30 sec | 32    |
| 68°C | 3 min  |       |
| 72°C | 7 min  | 1     |
| 12°C | hold   | 1     |

**Capillary electrophoresis**

|                                          |                |
|------------------------------------------|----------------|
| PCR product                              | 2.0 µl         |
| Size standard                            | 0.5 µl         |
| Formamide                                | 7.5 µl         |
| <b>Total</b>                             | <b>10.0 µl</b> |
| 95°C 5min and analyse with DNA analyzer. |                |

**Amplicon length analysis**

List

|                 |     |                         |
|-----------------|-----|-------------------------|
| Primer 4        | P15 | CAAGGAGGGAAACAACCGCAGCC |
| Primer 5        | P16 | GCAGGCACCGCAACCGCAG     |
| Analysis system | A4  | 4 % agarose gel         |

**PCR reaction (PR13)**

| Products           | Final conc.    |
|--------------------|----------------|
| Primer 4           | 0.2 µM         |
| Primer 5           | 0.2 µM         |
| AccuPrime buffer A | 1x             |
| AccuPrime Taq      | 0.4 U          |
| DNA                | 4.2 ng/µl      |
| <b>Total</b>       | <b>30.0 µl</b> |

AccuPrime GC-Rich DNA Polymerase (Invitrogen, USA)

**PCR protocol (PP13)**

| Temp | Time   | Cycle |
|------|--------|-------|
| 95°C | 3 min  | 1     |
| 95°C | 30 sec |       |
| 68°C | 30 sec | 35    |
| 72°C | 2 min  |       |
| 72°C | 10 min | 1     |
| 12°C | hold   | 1     |



**Laboratory E****RP-PCR**

List

|                               |    |                                                          |
|-------------------------------|----|----------------------------------------------------------|
| Primer 1                      | P4 | FAM-tgtaaacgacggccagtCAAGGAGGGAAACAACCGCAGCC             |
| Primer 2 (with GGGGCC repeat) | P5 | caggaacagctatgaccGGGCCCCGCCCCGACCACGCCCCGCCCCG<br>GCCCCG |
| Primer 3                      | P6 | caggaacagctatgacc                                        |
| Size standard                 | S1 | GeneScan 500ROX Size Standard (Applied Biosystems, USA)  |
| Analysis machine              | M1 | 3730 DNA Analyzer (Applied Biosystems, USA)              |
| Analysis software             | A1 | Peak Scanner Software v1.0 (Applied Biosystems, USA)     |

**PCR reaction (PR4)****PCR protocol (PP5)****Capillary electrophoresis**

| Products             | Final conc. | Temp      | Time   | Cycle                  | Dilute PCR product<br>PCR product:H <sub>2</sub> O=1.5:100                      |
|----------------------|-------------|-----------|--------|------------------------|---------------------------------------------------------------------------------|
| Qiagen buffer        | 1x          | 95°C      | 5 min  | 1                      | Diluted PCR product 5.0 µl<br>Size standard 0.07 µl<br>H <sub>2</sub> O 10.0 µl |
| Primer 1             | 0.4 µM      | 95°C      | 30 sec | 49                     |                                                                                 |
| Primer 2             | 0.2 µM      | 70-53.2°C | 30 sec | Every cycle<br>-0.35°C | Total 15.7 µl                                                                   |
| Primer 3             | 0.4 µM      | 68°C      | 40 sec |                        |                                                                                 |
| ATP, CTP, TTP (each) | 0.05 mM     |           |        |                        | 95°C 5min and analyse with<br>DNA analyzer.                                     |
| GTP                  | 0.0125 mM   | 95°C      | 30 sec |                        |                                                                                 |
| 7-deaza-2-deoxy GTP  | 0.0375 mM   | 58°C      | 30 sec | 16                     |                                                                                 |
| Q solution           | 1x          | 68°C      | 40 sec |                        |                                                                                 |
| Taq DNA polymerase   | 0.75 U      |           |        |                        |                                                                                 |
| DNA                  | 20 ng/µl    | 68°C      | 10 min | 1                      |                                                                                 |
| Total                | 25.0 µl     | 12°C      | hold   | 1                      |                                                                                 |

Taq DNA polymerase (QIAGEN,  
Germany)

**Amplicon length analysis**

List

|                   |     |                                                         |
|-------------------|-----|---------------------------------------------------------|
| Primer 4          | P14 | FAM-CAAGGAGGGAAACAACCGCAGCC                             |
| Primer 5          | P16 | GCAGGCACCGCAACCGCAG                                     |
| Size standard     | S1  | GeneScan 500ROX Size Standard (Applied Biosystems, USA) |
| Analysis machine  | M1  | 3730 DNA Analyzer (Applied Biosystems, USA)             |
| Analysis software | A1  | Peak Scanner Software v1.0 (Applied Biosystems, USA)    |

**PCR reaction (PR10)****PCR protocol (PP14)****Capillary electrophoresis**

| Products                                                                         | Final conc. | Temp    | Time    | Cycle               | Dilute PCR product<br>PCR product:H <sub>2</sub> O=1.5:100                      |
|----------------------------------------------------------------------------------|-------------|---------|---------|---------------------|---------------------------------------------------------------------------------|
| Primer 4                                                                         | 0.4 µM      | 98°C    | 5 min   | 1                   | Diluted PCR product 5.0 µl<br>Size standard 0.07 µl<br>H <sub>2</sub> O 10.0 µl |
| Primer 5                                                                         | 0.4 µM      | 97°C    | 30 sec  | 11                  |                                                                                 |
| Kit buffer                                                                       | 1x          | 65-55°C | 30 sec  | Every cycle<br>-1°C | Total 15.7 µl                                                                   |
| DNA                                                                              | 2.0 ng/µl   | 68°C    | 1.5 min |                     |                                                                                 |
| Total                                                                            | 25.0 µl     | 97°C    | 30 sec  |                     | 95°C 5min and analyse with<br>DNA analyzer.                                     |
| Kit buffer: One Taq 2x<br>Master Mix with GC Buffer<br>(New England BioLabs, UK) |             | 55°C    | 30 sec  | 24                  |                                                                                 |
|                                                                                  |             | 68°C    | 1.5 min |                     |                                                                                 |
|                                                                                  |             | 68°C    | 10 min  | 1                   |                                                                                 |
|                                                                                  |             | 12°C    | hold    | 1                   |                                                                                 |

Supple table 3D. Methods of each laboratory

**Laboratory F****RP-PCR**

List

|                               |     |                                                         |
|-------------------------------|-----|---------------------------------------------------------|
| Primer 1                      | P10 | FAM-AGTACTCGCTGAGGGTGAAC                                |
| Primer 2 (with GGGGCC repeat) | P11 | cgtacgcatcccagtttgagaGCCCCGCCCCGCCCCGG                  |
| Primer 3                      | P12 | cgtacgcatcccagtttgaga                                   |
| Size standard                 | S2  | GeneScan 500LIZ Size Standard (Applied Biosystems, USA) |
| Analysis machine              | M1  | 3730 DNA Analyzer (Applied Biosystems, USA)             |
| Analysis software             | A5  | In-house developed Tracl genotyping software            |

**PCR reaction (PR5)**

| Products              | Final conc.                   |
|-----------------------|-------------------------------|
| Buffer 2 (kit)        | 1x                            |
| Primer 1              | 0.33 $\mu$ M                  |
| Primer 2              | 0.33 $\mu$ M                  |
| Primer 3              | 0.03 $\mu$ M                  |
| dNTP (each)           | 0.5 mM                        |
| Betaine               | 2.0 M                         |
| Polymeras (TiTaq 50x) | 2x                            |
| DNA                   | 10 ng/ $\mu$ l                |
| <b>Total</b>          | <b>20.0 <math>\mu</math>l</b> |

Expand Long Template PCR system  
(Roche, Switzerland)**PCR protocol (PP6)**

| Temp | Time     | Cycle       |
|------|----------|-------------|
| 98°C | 10 min   | 1           |
| 97°C | 35 sec   | 10          |
| 53°C | 2 min    |             |
| 68°C | 2 min    |             |
| 97°C | 35 sec   | 25          |
| 53°C | 2 min    | Every cycle |
| 68°C | 2-10 min | +20 sec     |
| 68°C | 10 min   | 1           |
| 4°C  | hold     | 1           |

**Capillary electrophoresis**

|                                            |                                |
|--------------------------------------------|--------------------------------|
| PCR product                                | 2.0 $\mu$ l                    |
| Size standard                              | 0.35 $\mu$ l                   |
| Formamide                                  | 10.0 $\mu$ l                   |
| <b>Total</b>                               | <b>12.35 <math>\mu</math>l</b> |
| 95°C 1.5min and analyse with DNA analyzer. |                                |

**Amplicon length analysis**

List

|                   |     |                                                         |
|-------------------|-----|---------------------------------------------------------|
| Primer 4          | P17 | FAM-CAGGTGTGGGTTTAGGAGGT                                |
| Primer 5          | P18 | CCAGCTTCGGTCAGAGAAAT                                    |
| Size standard     | S4  | GeneScan 600LIZ Size Standard (Applied Biosystems, USA) |
| Analysis machine  | M1  | 3730 DNA Analyzer (Applied Biosystems, USA)             |
| Analysis software | A5  | In-house developed Tracl genotyping software            |

**PCR reaction (PR14)**

| Product             | Final conc.                   |
|---------------------|-------------------------------|
| Primer 4            | 0.3 $\mu$ M                   |
| Primer 5            | 0.3 $\mu$ M                   |
| dNTPs (each)        | 0.3 mM                        |
| Betaine             | 1.0 M                         |
| Kapa HiFi GC buffer | 1x                            |
| Polymerase (kit)    | 0.3U                          |
| DNA                 | 3.3 ng/ $\mu$ l               |
| <b>Total</b>        | <b>15.0 <math>\mu</math>l</b> |

Kapa HiFi Hotstart PCR kit (Kapa Biosystems, USA)

**PCR protocol (PP15)**

| Temp | Time   | Cycle |
|------|--------|-------|
| 95°C | 5 min  | 1     |
| 98°C | 20 sec | 33    |
| 59°C | 15 sec |       |
| 72°C | 1 min  |       |
| 72°C | 5 min  | 1     |
| 4°C  | hold   | 1     |

Ramping rate: 50%

**Capillary electrophoresis**

|                                            |                                |
|--------------------------------------------|--------------------------------|
| PCR product                                | 2.0 $\mu$ l                    |
| Size standard                              | 0.35 $\mu$ l                   |
| Formamide                                  | 10.0 $\mu$ l                   |
| <b>Total</b>                               | <b>12.35 <math>\mu</math>l</b> |
| 95°C 1.5min and analyse with DNA analyzer. |                                |

**Laboratory G****RP-PCR**

List

|                               |    |                                                            |
|-------------------------------|----|------------------------------------------------------------|
| Primer 1                      | P4 | FAM-tgtaaacgacggccagtCAAGGAGGGAAACAACCGCAGCC               |
| Primer 2 (with GGGGCC repeat) | P5 | caggaaacagctatgaccGGGCCC GCCCGACCGCCCCGCCCCG<br>GCCCCG     |
| Primer 3                      | P6 | caggaaacagctatgacc                                         |
| Size standard                 | S3 | GeneScan 400HD Rox Size Standard (Applied Biosystems, USA) |
| Analysis machine              | M1 | 3730 DNA Analyzer (Applied Biosystems, USA)                |
| Analysis software             | A2 | GeneMapper v4.0 (Applied Biosystems, USA)                  |

| PCR reaction (PR6)      |             | PCR protocol (PP7)                               |          |             | Capillary electrophoresis                   |         |
|-------------------------|-------------|--------------------------------------------------|----------|-------------|---------------------------------------------|---------|
| Products                | Final conc. | Temp                                             | Time     | Cycle       | Dilute PCR product<br>PCR product:H2O=1:5   |         |
| Qiagen buffer           | 1x          | 98°C                                             | 10 min   | 1           |                                             |         |
| Primer 1                | 1.0 µM      | 97°C                                             | 35 sec   | 10          | Diluted PCR product                         | 2.0 µl  |
| Primer 2                | 1.0 µM      | 64°C                                             | 2 min    |             | Size standard                               | 0.12 µl |
| Primer 3                | 1.0 µM      | 68°C                                             | 8 min    |             | Formamide                                   | 7.88 µl |
| dCTP, dATP, dTTP (each) | 0.25 mM     |                                                  |          |             | Total                                       | 10.0 µl |
| 7-deaza-2-deoxy GTP     | 0.25 mM     | 97°C                                             | 35 sec   | 25          | 95°C 2min and analyse with<br>DNA analyzer. |         |
| DMSO                    | 5%          | 64°C                                             | 2 min    | Every cycle |                                             |         |
| Betaine                 | 1.0 M       | 68°C                                             | 8-16 min | +20 sec     |                                             |         |
| Taq DNA polymerase      | 2.5 U       |                                                  |          |             |                                             |         |
| DNA *1                  | 12.5 ng/µl  | Reduce ramping rate up and down<br>to 0.5°C/sec. |          |             |                                             |         |
| Total                   | 20.0 µl     |                                                  |          |             |                                             |         |

Taq DNA polymerase, buffer (QIAGEN, Germany)

\*1: Initial DNA concentration ~250 ng/µl.

**Amplicon length analysis**

List

|                   |     |                                                            |
|-------------------|-----|------------------------------------------------------------|
| Primer 4          | P14 | FAM-CAAGGAGGGAAACAACCGCAGCC                                |
| Primer 5          | P16 | GCAGGCACCGCAACCGCAG                                        |
| Size standard     | S3  | GeneScan 400HD Rox Size Standard (Applied Biosystems, USA) |
| Analysis machine  | M1  | 3730 DNA Analyzer (Applied Biosystems, USA)                |
| Analysis software | A2  | GeneMapper v4.0 (Applied Biosystems, USA)                  |

| PCR reaction (PR15)     |             | PCR protocol (PP16) |        |       | Capillary electrophoresis                   |         |
|-------------------------|-------------|---------------------|--------|-------|---------------------------------------------|---------|
| Products                | Final conc. | Temp                | Time   | Cycle | Dilute PCR product<br>PCR product:H2O=1:180 |         |
| Primer 4                | 1.0 µM      | 94°C                | 4 min  | 1     |                                             |         |
| Primer 5                | 1.0 µM      | 94°C                | 30 sec | 36    | Diluted PCR product                         | 3.0 µl  |
| dCTP, dATP, dTTP (each) | 0.25 mM     | 62°C                | 30 sec |       | Size standard                               | 0.10 µl |
| 7-deaza-2-deoxy GTP     | 0.25 mM     | 72°C                | 1 min  |       | HiDi Formamide                              | 6.90 µl |
| DMSO                    | 5%          |                     |        |       | Total                                       | 10.0 µl |
| Betaine                 | 1.0 M       | 72°C                | 10 min | 1     | 95°C 2min and analyse with<br>DNA analyzer. |         |
| Qiagen buffer           | 1x          |                     |        |       |                                             |         |
| Taq DNA polymerase      | 2.5 U       |                     |        |       |                                             |         |
| DNA *2                  | 3.35 ng/µl  |                     |        |       |                                             |         |
| Total                   | 20.0 µl     |                     |        |       |                                             |         |

Taq DNA polymerase, buffer (QIAGEN, Germany)

\*2: Initial DNA concentration ~67 ng/µl.

Supple table 3D. Methods of each laboratory

**Laboratory H****RP-PCR**

List

|                               |    |                                                         |
|-------------------------------|----|---------------------------------------------------------|
| Primer 1                      | P1 | FAM-AGTCGCTAGAGGCGAAAGC                                 |
| Primer 2 (with GGGGCC repeat) | P2 | tacgcatcccagtttgagacgGGGGCCGGGGCCGGGGCCGGGG             |
| Primer 3                      | P3 | tacgcatcccagtttgagacg                                   |
| Size standard                 | S2 | GeneScan 500LIZ Size Standard (Applied Biosystems, USA) |
| Analysis machine              | M1 | 3730 DNA Analyzer (Applied Biosystems, USA)             |
| Analysis software             | A2 | GeneMapper v4.0 (Applied Biosystems, USA)               |

**PCR reaction (PR1)****PCR protocol (PP8)****Capillary electrophoresis**

| Products             | Final conc. | Temp    | Time   | Cycle       | Dilute PCR product<br>PCR product:H <sub>2</sub> O=1:19 |
|----------------------|-------------|---------|--------|-------------|---------------------------------------------------------|
| FastStart PCR Master | 1x          | 95°C    | 5 min  | 1           |                                                         |
| Primer 1             | 1.4 µM      | 95°C    | 30 sec | 8           | Diluted PCR product 2.0 µl                              |
| Primer 2             | 0.7 µM      | 70-56°C | 30 sec | Every cycle | Formamide mix 8.6 µl                                    |
| Primer 3             | 1.4 µM      | 72°C    | 3 min  | -2°C        | Total 10.6 µl                                           |
| 7-deaza-2-deoxy GTP  | 0.18 mM     |         |        |             |                                                         |
| DMSO                 | 7 %         | 95°C    | 30 sec |             | Formamide mix=8µl Size<br>standard + 850µl Formamide    |
| Q solution           | 1x          | 56°C    | 30 sec | 35          |                                                         |
| MgCl <sub>2</sub>    | 0.89        | 72°C    | 3 min  |             |                                                         |
| DNA                  | 7.1 ng/µl   |         |        |             | No denaturation.<br>Analyze with DNA analyzer.          |
| Total                | 28.1 µl     | 72°C    | 20 min | 1           |                                                         |
|                      |             | 4°C     | hold   | 1           |                                                         |

FastStart PCR Master (Roche,  
Switzerland)

Q solution (QIAGEN, Germany)

**Amplicon length analysis**

List

|                   |     |                                                         |
|-------------------|-----|---------------------------------------------------------|
| Primer 4          | P14 | FAM-CAAGGAGGGAAACAACCGCAGCC                             |
| Primer 5          | P16 | GCAGGCACCGCAACCGCAG                                     |
| Size standard     | S2  | GeneScan 500LIZ Size Standard (Applied Biosystems, USA) |
| Analysis machine  | M1  | 3730 DNA Analyzer (Applied Biosystems, USA)             |
| Analysis software | A2  | GeneMapper v4.0 (Applied Biosystems, USA)               |

**PCR reaction (PR16)****PCR protocol (PP17)****Capillary electrophoresis**

| Products             | Final conc. | Temp    | Time   | Cycle       | Dilute PCR product<br>PCR product:H <sub>2</sub> O=1:39 |
|----------------------|-------------|---------|--------|-------------|---------------------------------------------------------|
| Primer 4             | 0.5 µM      | 95°C    | 4 min  | 1           |                                                         |
| Primer 5             | 0.5 µM      | 95°C    | 30 sec | 14          | Diluted PCR product 2.0 µl                              |
| 7-deaza-2-deoxy GTP  | 0.18 mM     | 70-57°C | 30 sec | Every cycle | Formamide mix 8.6 µl                                    |
| DMSO                 | 7.1 %       | 72°C    | 3 min  | -1°C        | Total 10.6 µl                                           |
| Q solution           | 1x          |         |        |             |                                                         |
| MgCl <sub>2</sub>    | 0.89 mM     | 95°C    | 30 sec |             | Formamide mix=8µl Size<br>standard + 850µl Formamide    |
| FastStart PCR master | 1x          | 56°C    | 30 sec | 26          |                                                         |
| DNA                  | 7.1 ng/µl   | 72°C    | 3 min  |             |                                                         |
| Total                | 28.0 µl     | 72°C    | 10 min | 1           | No denaturation.<br>Analyze with DNA analyzer.          |
|                      |             | 4°C     | hold   | 1           |                                                         |

FastStart PCR Master (Roche,  
Switzerland)

Q solution (QIAGEN, Germany)

**Laboratory I****RP-PCR**

List

|                               |    |                                                           |
|-------------------------------|----|-----------------------------------------------------------|
| Primer 1                      | P4 | FAM-tgtaaacacgacggccagtCAAGGAGGGAAACAACCGCAGCC            |
| Primer 2 (with GGGGCC repeat) | P5 | caggaaacagctatgaccGGGCCCCGCCCGACACGCCCCGGCCCCG<br>GCCCCGG |
| Primer 3                      | P6 | caggaaacagctatgacc                                        |
| Size standard                 | S1 | GeneScan 500ROX Size Standard (Applied Biosystems, USA)   |
| Analysis machine              | M3 | 3500 Genetic Analyzer (Applied Biosystems, USA)           |
| Analysis software             | A2 | GeneMapper v4.0 (Applied Biosystems, USA)                 |

**PCR reaction (PR7)****PCR protocol (PP7)****Capillary electrophoresis**

| Products                | Final conc. | Temp | Time     | Cycle | PCR product   | 1.5 µl                 |                                                 |
|-------------------------|-------------|------|----------|-------|---------------|------------------------|-------------------------------------------------|
| AccuPrime buffer A      | 1x          | 98°C | 10 min   | 1     | Size standard | 0.5 µl                 |                                                 |
| Primer 1                | 1.4 µM      | 97°C | 35 sec   | 10    | Formamide     | 15.0 µl                |                                                 |
| Primer 2                | 0.7 µM      | 64°C | 2 min    |       | 25            | Total                  | 17.0 µl                                         |
| Primer 3                | 1.4 µM      | 68°C | 8 min    |       |               | Every cycle<br>+20 sec | 95°C 5min and analyse<br>with genetic analyzer. |
| dCTP, dATP, dTTP (each) | 0.18 mM     | 97°C | 35 sec   | 1     |               |                        |                                                 |
| 7-deaza-2-deoxy GTP     | 0.18 mM     | 64°C | 2 min    |       |               |                        |                                                 |
| Taq DNA polymerase      | 1.0 U       | 68°C | 8-16 min |       |               |                        |                                                 |
| DNA                     | 12 ng/µl    |      |          |       |               |                        |                                                 |
| Total                   | 25.0 µl     | 16°C | hold     |       |               |                        |                                                 |

AccuPrime GC-rich DNA polymerase,  
buffer A (Invitrogen, USA)

Ramp rate adjusted to 64% for the  
denaturation and extension steps.  
Ramp rate adjusted to 25% for the  
annealing step.

**Amplicon length analysis**

List

|                 |     |                         |
|-----------------|-----|-------------------------|
| Primer 4        | P15 | CAAGGAGGGAAACAACCGCAGCC |
| Primer 5        | P16 | GCAGGCACCGCAACCGCAG     |
| Analysis system | A4  | 3% agarose gel          |

**PCR reaction (PR13)****PCR protocol (PP18)**

| Products                                                   | Final conc. | Temp | Time   | Cycle |
|------------------------------------------------------------|-------------|------|--------|-------|
| Primer 4                                                   | 0.2 µM      | 95°C | 3 min  | 1     |
| Primer 5                                                   | 0.2 µM      | 95°C | 30 sec | 35    |
| Kit buffer                                                 | 1x          | 63°C | 30 sec |       |
| Kit polymerase                                             | 0.4 U       | 72°C | 2 min  |       |
| DNA                                                        | 2.0 ng/µl   |      |        | 1     |
| Total                                                      | 25.0 µl     | 72°C | 10 min |       |
| Kit: AccuPrime GC-rich DNA<br>polymerase (Invitrogen, USA) |             | 16°C | hold   | 1     |

Supple table 3D. Methods of each laboratory

**Laboratory J****RP-PCR**

List

|                               |    |                                                         |
|-------------------------------|----|---------------------------------------------------------|
| Primer 1                      | P4 | FAM-tgtaaacgacggccagtCAAGGAGGGAAACAACCGCAGCC            |
| Primer 2 (with GGGGCC repeat) | P5 | caggaaacagctatgaccGGGCCCCGCCCGACCACGCCCGGCCCGGCCCCGG    |
| Primer 3                      | P6 | caggaaacagctatgacc                                      |
| Size standard                 | S2 | GeneScan 500LIZ Size Standard (Applied Biosystems, USA) |
| Analysis machine              | M1 | 3730x/DNA Analyzer (Applied Biosystems, USA)            |
| Analysis software             | A2 | GeneMapper v4.1 (Applied Biosystems, USA)               |

| <b>PCR reaction (PR8)</b>                   |              | <b>PCR protocol (PP9)</b> |          |             | <b>Capillary electrophoresis</b> |                |
|---------------------------------------------|--------------|---------------------------|----------|-------------|----------------------------------|----------------|
| Products                                    | Final conc.  | Temp                      | Time     | Cycle       | PCR product                      | 1.0 µl         |
| Extensor Mastermix                          | 1x           | 95°C                      | 5 min    | 1           | Size standard                    | 0.5 µl         |
| Primer 1                                    | 2.5 µM       | 95°C                      | 30 sec   | 8           | Formamide                        | 8.5 µl         |
| Primer 2                                    | 2.5 µM       | 70-56°C                   | 30 sec   | Every cycle | <b>Total</b>                     | <b>10.0 µl</b> |
| Primer 3                                    | 0.25 µM      | 72°C                      | 8 min    | -2°C        | 95°C 2min and on ice.            |                |
| Betaine                                     | 1.75 M       | 95°C                      | 30 sec   | 26          | Analyse with DNA analyzer.       |                |
| DNA                                         | 3.3 ng/µl    | 56°C                      | 30 sec   | Every cycle |                                  |                |
| <b>Total</b>                                | <b>15 µl</b> | 72°C                      | 8-16 min | +20 sec     |                                  |                |
| Extensor Mastermix (Thermo Scientific, USA) |              | 72°C                      | 7 min    | 1           |                                  |                |

**Amplicon length analysis**

List

|                   |     |                                                         |
|-------------------|-----|---------------------------------------------------------|
| Primer 4          | P14 | FAM-CAAGGAGGGAAACAACCGCAGCC                             |
| Primer 5          | P16 | GCAGGCACCGCAACCGCAG                                     |
| Size standard     | S2  | GeneScan 500LIZ Size Standard (Applied Biosystems, USA) |
| Analysis machine  | M1  | 3730x/ DNA Analyzer (Applied Biosystems, USA)           |
| Analysis software | A2  | GeneMapper v4.1 (Applied Biosystems, USA)               |

| <b>PCR reaction (PR17)</b>   |              | <b>PCR protocol (PP19)</b> |          |             | <b>Capillary electrophoresis</b> |                |
|------------------------------|--------------|----------------------------|----------|-------------|----------------------------------|----------------|
| Products                     | Final conc.  | Temp                       | Time     | Cycle       | PCR product                      | 1.0 µl         |
| Primer 4                     | 0.1 µM       | 95°C                       | 5 min    | 1           | Size standard                    | 0.5 µl         |
| Primer 5                     | 0.1 µM       | 95°C                       | 30 sec   | 8           | Formamide                        | 8.5 µl         |
| DMSO                         | 1%           | 70-56°C                    | 30 sec   | Every cycle | <b>Total</b>                     | <b>10.0 µl</b> |
| Megamix Blue                 | 1x           | 72°C                       | 8 min    | -2°C        | 95°C 2min and on ice.            |                |
| DNA                          | 3.3 ng/µl    | 95°C                       | 30 sec   | 26          | Analyse with DNA analyzer.       |                |
| <b>Total</b>                 | <b>15 µl</b> | 56°C                       | 30 sec   | Every cycle |                                  |                |
| Megamix Blue (Microzone, UK) |              | 72°C                       | 8-16 min | +20 sec     |                                  |                |
|                              |              | 72°C                       | 7 min    | 1           |                                  |                |
|                              |              | 4°C                        | hold     | 1           |                                  |                |

**Laboratory L****RP-PCR**

List

|                               |    |                                                            |
|-------------------------------|----|------------------------------------------------------------|
| Primer 1                      | P1 | FAM-AGTCGCTAGAGGCGAAAGC                                    |
| Primer 2 (with GGGGCC repeat) | P2 | tacgcatcccagtttgagacgGGGGCCGGGGCCGGGGCCGGGG                |
| Primer 3                      | P3 | tacgcatcccagtttgagacg                                      |
| Size standard                 | S1 | GeneScan 500XL ROX Size Standard (Applied Biosystems, USA) |
| Analysis machine              | M1 | 3730x/DNA Analyzer (Applied Biosystems, USA)               |
| Analysis software             | A1 | Peak Scanner Software v1.0 (Applied Biosystems, USA)       |

**PCR reaction (PR1)**

| Products             | Final conc.    |
|----------------------|----------------|
| FastStart PCR Master | 1x             |
| Primer 1             | 1.4 µM         |
| Primer 2             | 0.7 µM         |
| Primer 3             | 1.4 µM         |
| 7-deaza-2-deoxy GTP  | 0.18 mM        |
| DMSO                 | 7 %            |
| Q solution           | 1x             |
| MgCl <sub>2</sub>    | 0.89 mM        |
| DNA                  | 100 ng         |
| <b>Total</b>         | <b>28.0 µl</b> |

FastStart PCR Master (Roche, Switzerland)  
Q solution (QIAGEN, Germany)

**PCR protocol (PP1)**

| Temp    | Time   | Cycle |
|---------|--------|-------|
| 95°C    | 15 min | 1     |
| 94°C    | 1 min  | 2-8 * |
| 70-58°C | 1 min  |       |
| 72°C    | 3 min  |       |
| 94°C    | 1 min  | 5     |
| 56°C    | 1 min  |       |
| 72°C    | 3 min  |       |
| 72°C    | 10 min | 1     |

\* Every 2°C decrease add 1 cycle.

**Capillary electrophoresis**

|                |               |
|----------------|---------------|
| PCR product    | 2.0 µl        |
| Size standard  | 0.5 µl        |
| HiDi Formamide | 7.0 µl        |
| <b>Total</b>   | <b>9.5 µl</b> |

95°C 3min and analyse with DNA analyzer.

**Amplicon length analysis**...not performed.

**Laboratory M****RP-PCR**

List

|                               |    |                                                             |
|-------------------------------|----|-------------------------------------------------------------|
| Primer 1                      | P4 | FAM-tgtaaacgacgcccagtCAAGGAGGGAAACAACCGCAGCC                |
| Primer 2 (with GGGGCC repeat) | P5 | caggaaacagctatgaccGGGCCCCGCCCCGACCACGCCCCGGCCCCG<br>GCCCCGG |
| Primer 3                      | P6 | caggaaacagctatgacc                                          |
| Size standard                 | S2 | GeneScan 500 LIZ Size Standard (Applied Biosystems, USA)    |
| Analysis machine              | M1 | 3730x/DNA Analyzer (Applied Biosystems, USA)                |
| Analysis software             | A1 | Peak Scanner Software v1.0 (Applied Biosystems, USA)        |

| <b>PCR reaction (PR6)</b> |             | <b>PCR protocol (PP7)</b>      |          |             | <b>Capillary electrophoresis</b>            |         |
|---------------------------|-------------|--------------------------------|----------|-------------|---------------------------------------------|---------|
| Products                  | Final conc. | Temp                           | Time     | Cycle       | PCR product                                 |         |
| Qiagen buffer             | 1x          | 98°C                           | 10 min   | 1           | PCR product                                 | 1.0 µl  |
| Primer 1                  | 1.0 µM      | 97°C                           | 35 sec   | 10          | Size standard                               | 0.1 µl  |
| Primer 2                  | 1.0 µM      | 64°C                           | 2 min    |             | Formamide                                   | 19.9 µl |
| Primer 3                  | 1.0 µM      | 68°C                           | 8 min    |             | Total                                       | 21.0 µl |
| dCTP, dATP, dTTP (each)   | 0.25 mM     | 97°C                           | 35 sec   | 25          | 95°C 5min and analyse<br>with DNA analyzer. |         |
| 7-deaza-2-deoxy GTP       | 0.25 mM     | 64°C                           | 2 min    | Every cycle |                                             |         |
| DMSO                      | 5%          | 68°C                           | 8-16 min | +20 sec     |                                             |         |
| Betaine                   | 1.0 M       | Ramping up and down: 0.5°C/sec |          |             |                                             |         |
| Taq DNA polymerase        | 2.5 U       |                                |          |             |                                             |         |
| DNA                       | 5.0 ng/µl   |                                |          |             |                                             |         |
| Total                     | 20.0 µl     |                                |          |             |                                             |         |

*Taq* DNA polymerase, buffer (QIAGEN, Germany)

**Amplicon length analysis...**not performed.



Supple table 3D. Methods of each laboratory

**Laboratory N****RP-PCR**

List

|                               |    |                                                         |
|-------------------------------|----|---------------------------------------------------------|
| Primer 1                      | P1 | FAM-AGTCGCTAGAGGCGAAAGC                                 |
| Primer 2 (with GGGGCC repeat) | P2 | tacgcatcccagtttgagacgGGGGCCGGGGCCGGGGCCGGGG             |
| Primer 3                      | P3 | tacgcatcccagtttgagacg                                   |
| Size standard                 | S1 | GeneScan 500ROX Size Standard (Applied Biosystems, USA) |
| Analysis machine              | M2 | 3130 Genetic Analyzer (Applied Biosystems, USA)         |
| Analysis software             | A3 | Genotyper v4 (Applied Biosystems, USA)                  |

| <b>PCR reaction (PR9)</b>                        |                | <b>PCR protocol (PP1)</b>                                |        |       | <b>Capillary electrophoresis</b>         |         |
|--------------------------------------------------|----------------|----------------------------------------------------------|--------|-------|------------------------------------------|---------|
| Products                                         | Final conc.    | Temp                                                     | Time   | Cycle | PCR product                              | 2.0 µl  |
| True Allele PCR premix                           | 1x             | 95°C                                                     | 15 min | 1     | Size standard                            | 0.5 µl  |
| Primer 1                                         | 1.4 µM         | 94°C                                                     | 1 min  | 2-8 * | Formamide                                | 12.5 µl |
| Primer 2                                         | 0.7 µM         | 70-58°C                                                  | 1 min  |       | Total                                    | 15.0 µl |
| Primer 3                                         | 1.4 µM         | 72°C                                                     | 3 min  |       | 95°C 2min and analyse with DNA analyzer. |         |
| 7-deaza-2-deoxy GTP                              | 0.16 mM        | 94°C                                                     | 1 min  | 5     |                                          |         |
| DMSO                                             | 7%             | 56°C                                                     | 1 min  |       |                                          |         |
| Betaine                                          | 0.83 M         | 72°C                                                     | 3 min  | 1     |                                          |         |
| MgCl <sub>2</sub>                                | 0.83 mM        | 72°C                                                     | 10 min |       |                                          |         |
| DNA                                              | 3.3ng/µl       | 4°C                                                      | hold   | 1     |                                          |         |
| <b>Total</b>                                     | <b>30.0 µl</b> |                                                          |        |       |                                          |         |
| True Allele PCR premix (Applied Biosystems, USA) |                | * Every 2°C decrease add 1 cycle.<br>Ramp speed: 1°C/sec |        |       |                                          |         |

**Amplicon length analysis...**not performed.

**Supplementary table 4. The definitions of an expansion of the GGGGCC-repeat in  
*C9orf72* as used in 13 laboratories.**

---

**GGGGCC-repeat number (4 laboratories)**

- > 24 repeats
- ≥ 30 repeats
- > 30 repeats (2 laboratories)

**RP-PCR shape (2 laboratories)**

Clear saw-tooth sloping pattern

**GGGGCC-repeat number + RP-PCR shape (1 laboratory)**

>30 repeats + Stutter profile in RP-PCR

**GGGGCC-repeat number + RP-PCR shape + Amplicon-length analysis result (1 laboratory)**

Saw-tooth pattern over 460 bp (30 repeats) in RP-PCR + One amplicon in amplicon-length analysis

**RP-PCR shape + Amplicon-length analysis result (1 laboratory)**

Saw-tooth pattern in RP-PCR + One amplicon in amplicon-length analysis

**RP-PCR shape + Amplicon-length analysis result + Southern blot result (4 laboratories)**

- Saw-tooth pattern with concave shape in RP-PCR + One amplicon in amplicon-length analysis + Expanded band in Southern blot
  - One amplicon in amplicon-length analysis + Saw-tooth profile in RP-PCR + Expanded band in Southern blot
  - One amplicon in amplicon-length analysis + Long stutter in RP-PCR + Expanded band in Southern blot (2 laboratories)
-

**Supplementary table 5. Summary of the Southern blot methods of three laboratories.**

|                    | Laboratory I             | Laboratory II             | Laboratory III          |
|--------------------|--------------------------|---------------------------|-------------------------|
| Labelling          | Radioisotope             | Radioisotope              | DIG system              |
| Dose of gDNA       | 10 µg                    | 10 µg                     | 6-10 µg                 |
| Probe primer-F     | TGACACACCAAGCGTCA<br>TCT | TATTAAGGTTCGCACAC<br>GCTA | AGAACAGGACAAGTTGCC      |
| Probe primer-R     | CACTGTGGGAGCAGTGT<br>CAT | GACGGCTGACACACCAA<br>G    | AACACACACCTCCTAAAC<br>C |
| Probe length       | 1000bp                   | 210 bp                    | 241 bp                  |
| Restriction enzyme | Xba I and Hind III       | Xba I and Hind III        | Xba I                   |

Supplementary Figure 1a,b,c,d

A

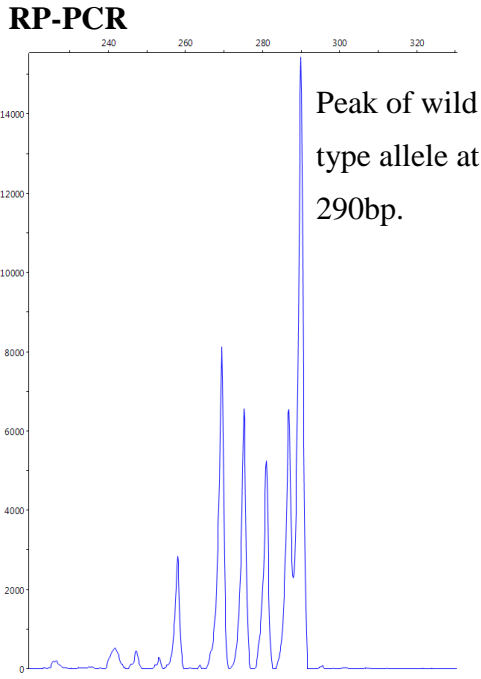

Amplicon-length analysis

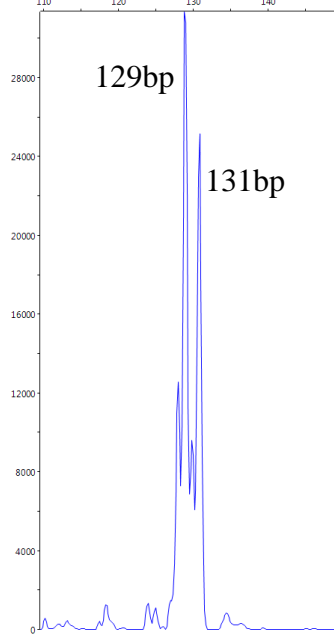

129bp: Peak of wild type allele with 2 repeats.  
131bp: Peak of mutant allele with 6 repeats.

B

Sequence

WT CGCGCTAGGGGCGGGGCGGGGCGTGGTCGGGGCGGGCCCGGGGCGGGCCCGGGG

Mut. CGCGCTAGGGGCGGGGCGGGGCGGGGCGGGGCGGGGCGGGGCGGGGCGGGCCCGGGG

1 2 deletion 15bp

1 2 3 4 5 6 insertion 17bp

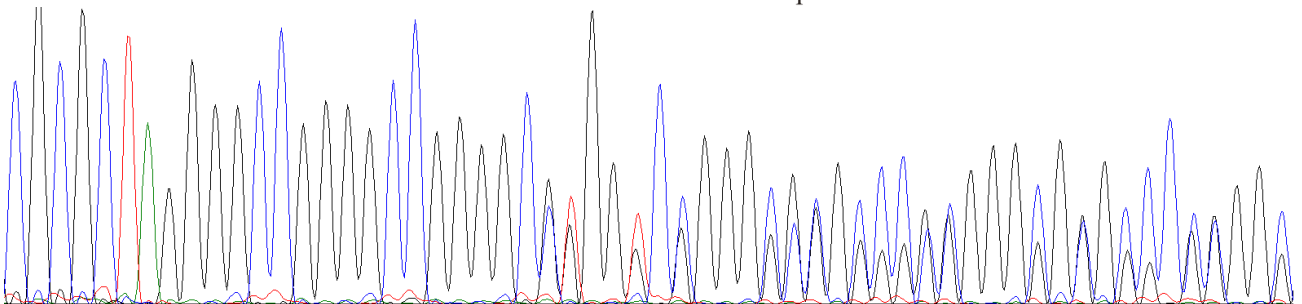

Supplementary figure 1a.b.c.d (cont.)

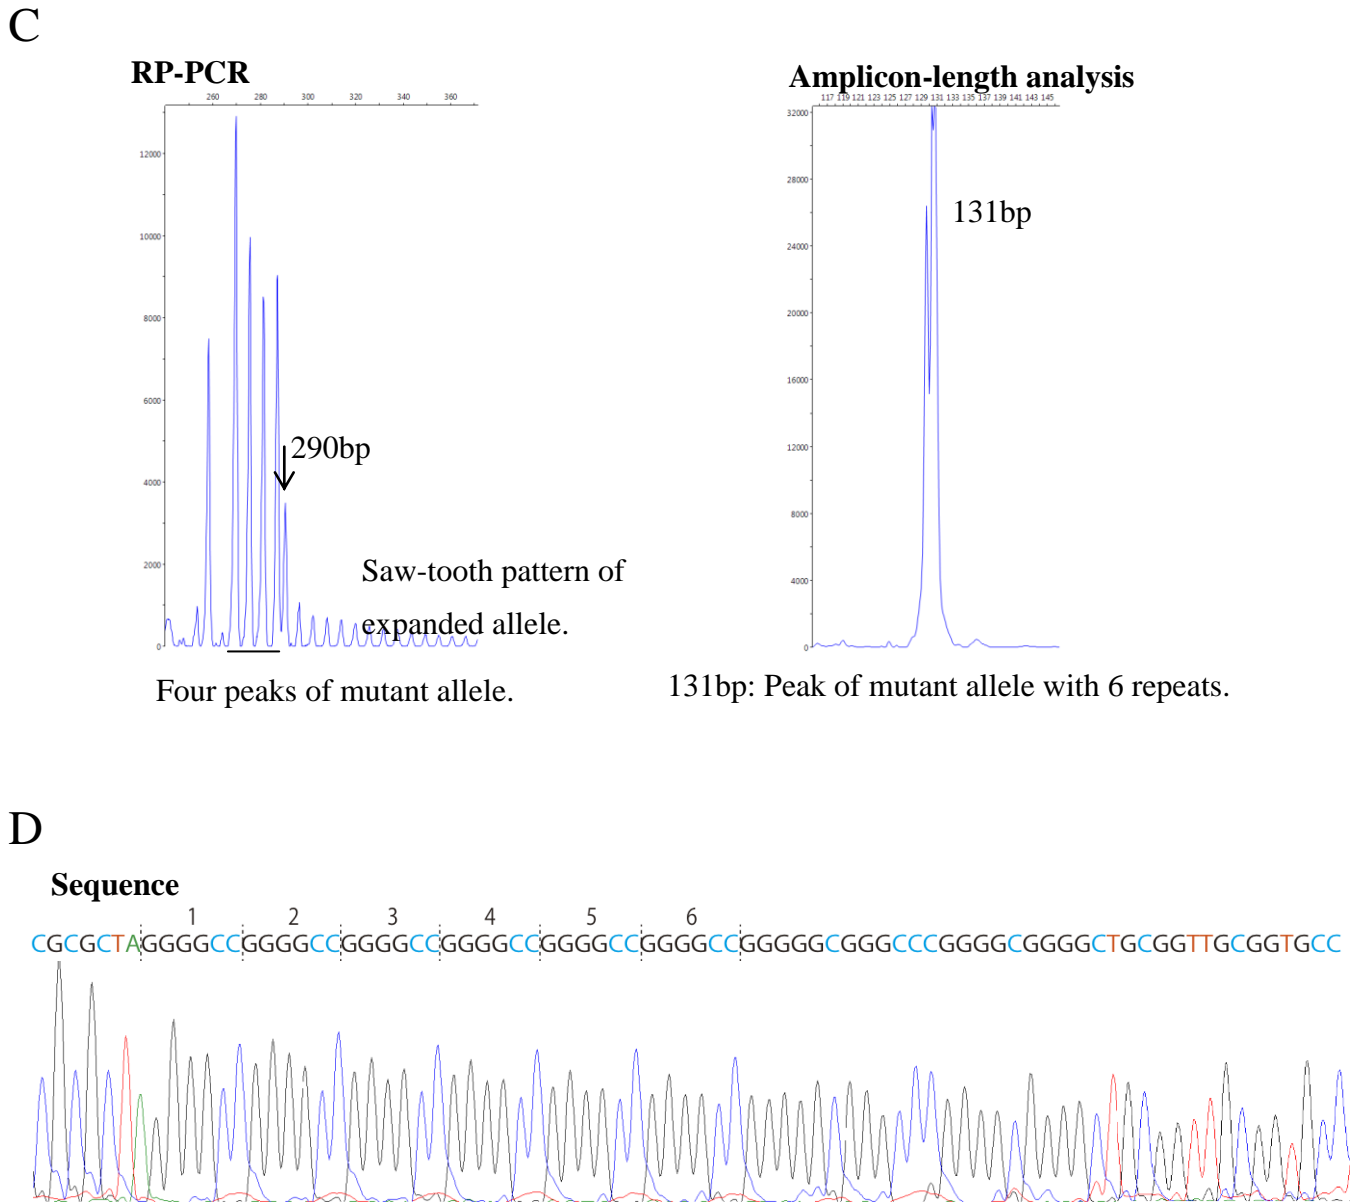

**Supplementary figure 1. Detailed analyses of the results of the three samples with mutations.**

(A) The Rp-PCR and amplicon length analysis of sample 8.1. In RP-PCR there are four peaks before the wild-type allele peak at 290 bp. In amplicon-length analysis there are two peaks at 129bp (wild-type allele) and 131bp (the mutant allele), respectively and the two peaks are close together.

As a consequence, four laboratories interpreted this sample as having one amplicon.

- (B) The sequence of sample 8.1. The wild-type allele has two GGGGCC-repeats and the mutant allele has six GGGGCC-repeats with a complex 15 deletion/17bp insertion mutation. Sample 8.1 and Sample 8.2 both carries this mutation.
- (C) The RP-PCR and amplicon length analysis results of sample 32.1. In RP-PCR there are four peaks before the 290bp peak (mutant allele) and a saw-tooth pattern peaks (expanded allele). In amplicon-length analysis there is one peak at 131bp (mutant allele) with 6 repeats.
- (D) The sequence of 32.1 illustrating the mutant allele which has six repeats with a complex 15bp deletion/17bp insertion mutation.

Supplementary Figure 2

Laboratory I

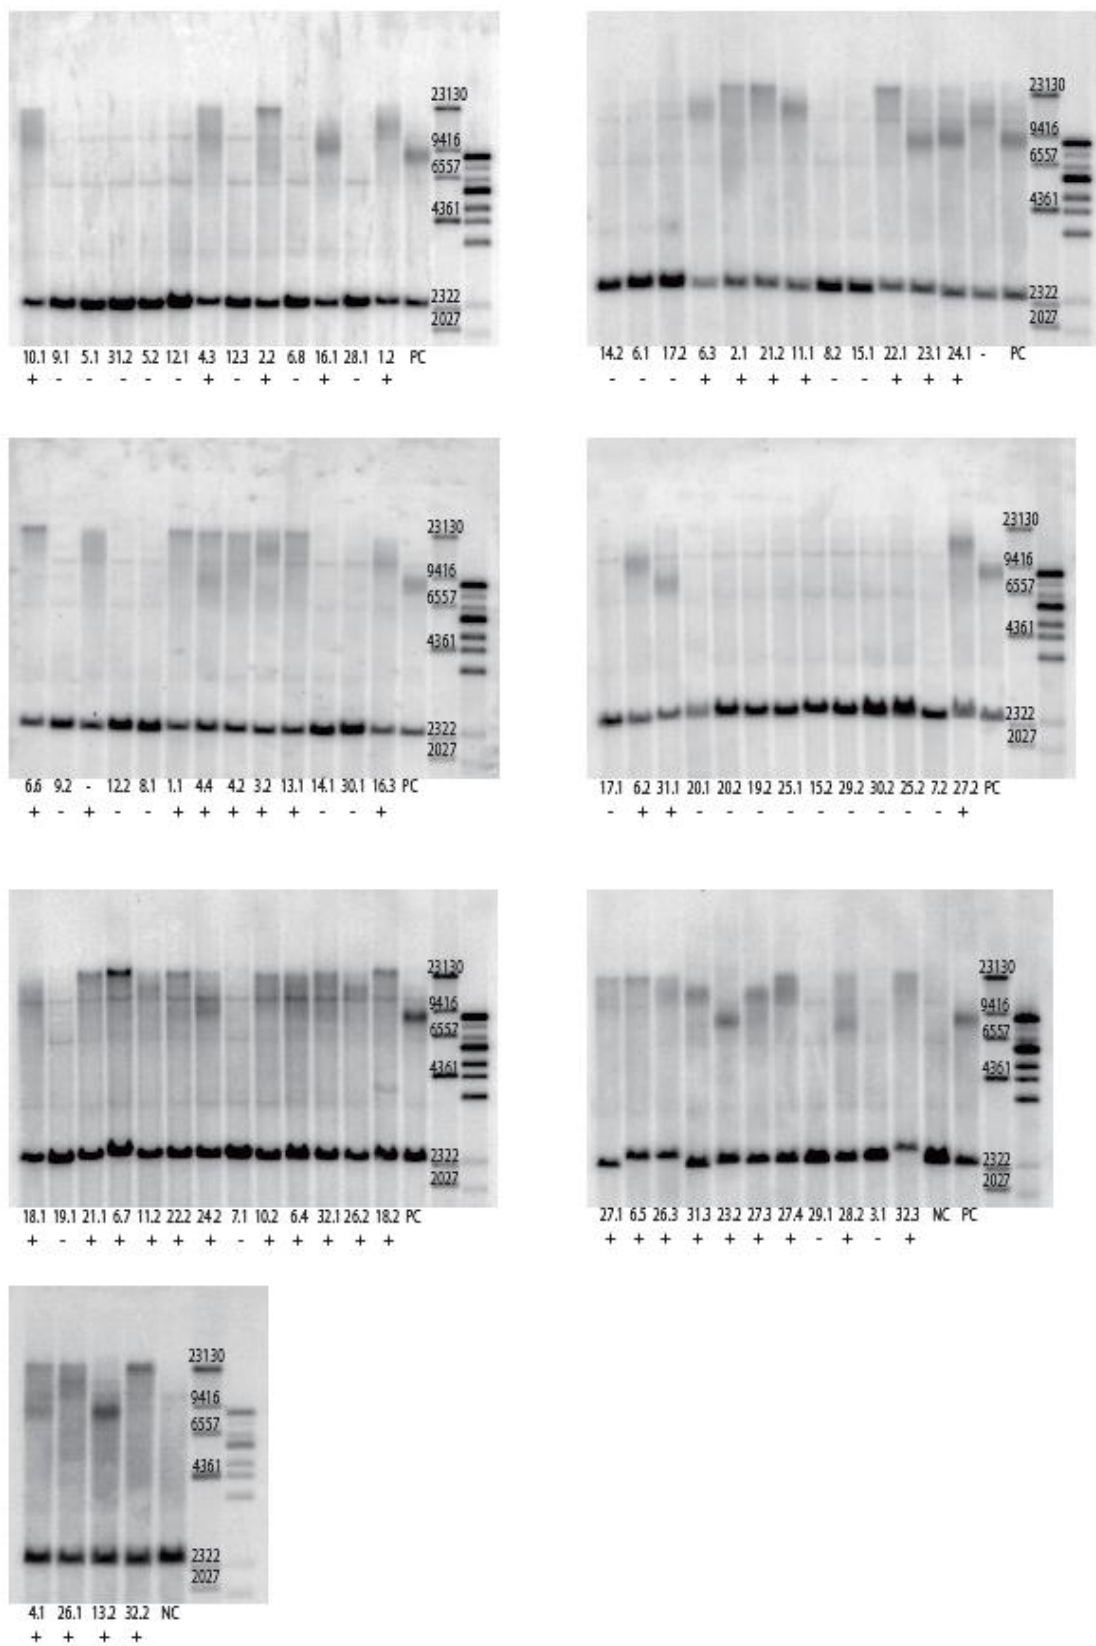

Supplementary Figure 2 (cont.)

Laboratory II

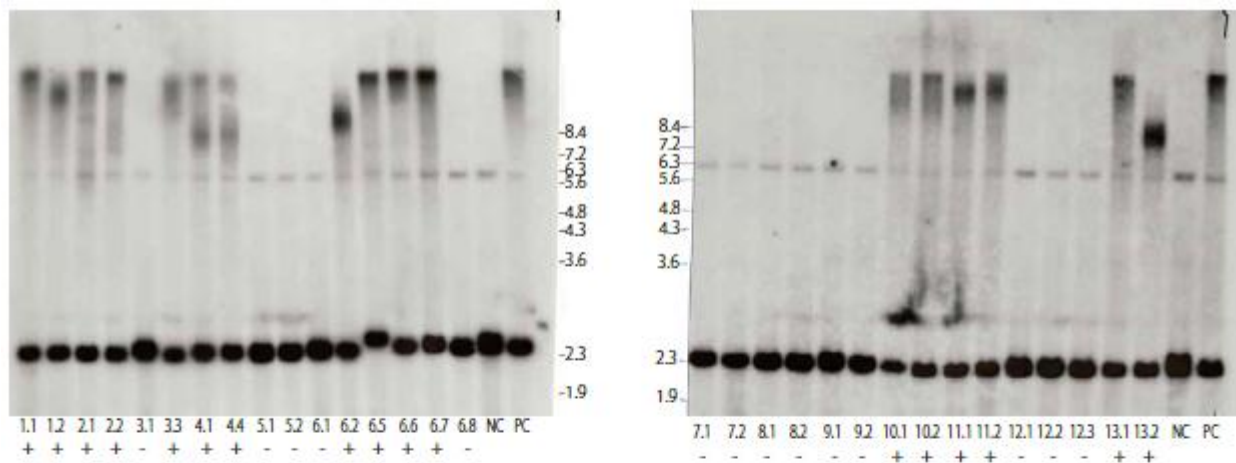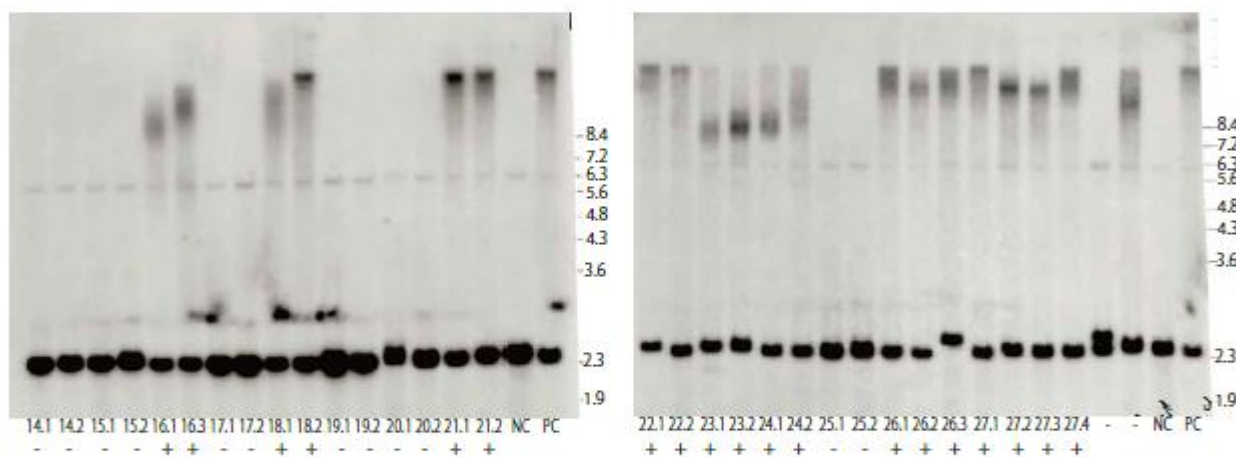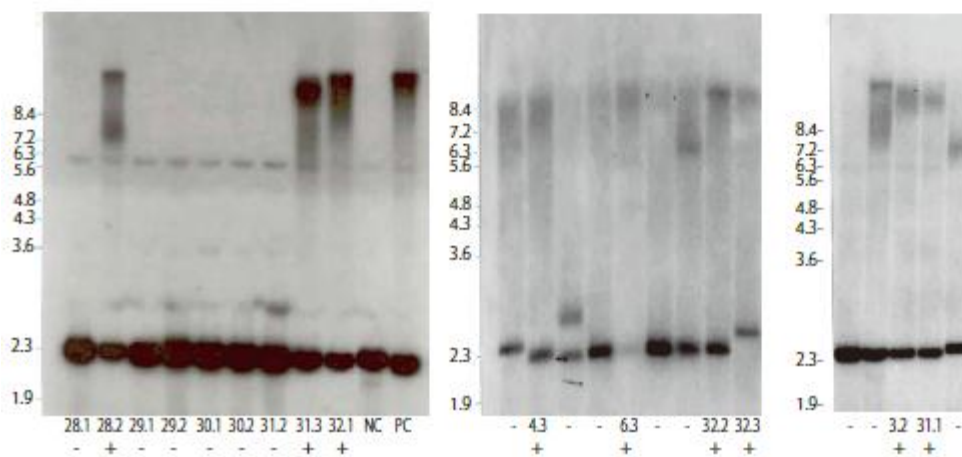

Supplementary Figure II (cont.)

Laboratory III



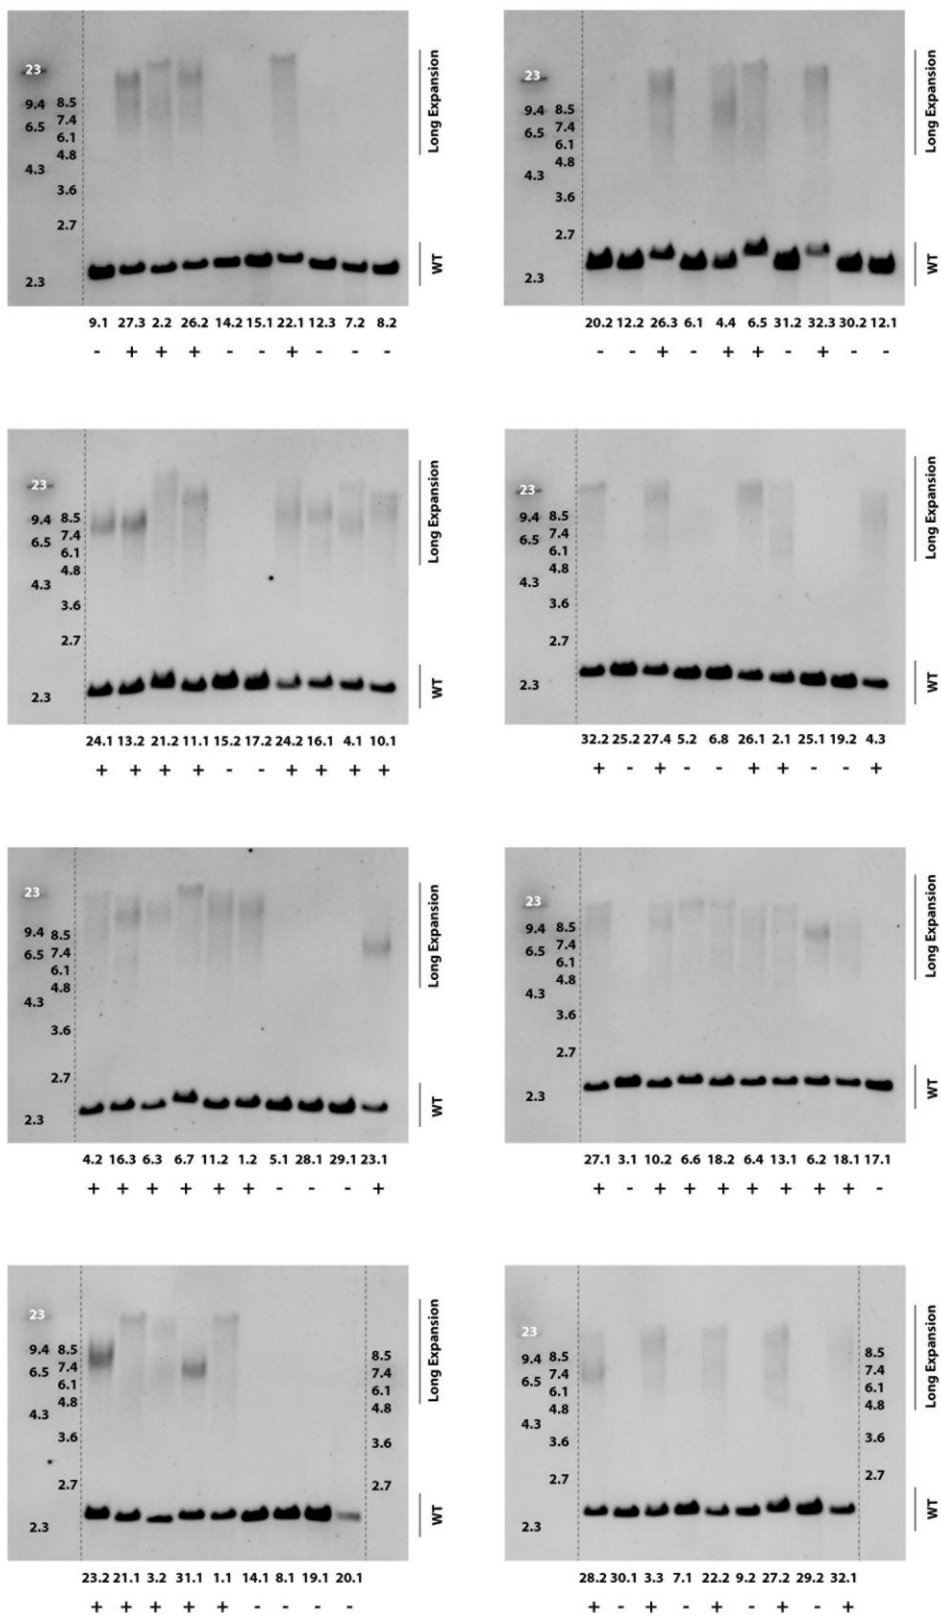

**Supplementary Figure 2. The Southern blot results in three laboratories.**

Laboratory III ran out of DNA from one individual (sample 31.1). This laboratory therefore only

performed SB on 77 samples.

PC: Positive control, NC: negative control, +: sample with large repeat expansion, -: sample without large repeat expansion.
